# Supplementary material for: Crystal structural analysis of methyl-substituted pyrazines with anilic acids: a combined diffraction, inelastic neutron scattering,1H-NMR study and theoretical approach
Source: Royal Society of Chemistry journal article supplement (doi:10.1039/c8ce00040a), 2018-01-01
Supplement: c8ce00040a1.pdf [file c8ce00040a1.pdf]

## Supplementary Materials

### The crystal structures analysis of the methyl-substituted pyrazines with anilic acids: a combined diffraction, inelastic neutron scattering, <sup>1</sup>H NMR studies and theoretical approach

M. Rok<sup>1\*</sup>, G. Bator<sup>1</sup>, W. Sawka-Dobrowolska<sup>1</sup>, P. Durlak<sup>1</sup>, M. Moskwa<sup>1</sup>, W. Medycki<sup>2</sup>, L. Sobczyk<sup>1</sup>,  
M. Zamponi<sup>3</sup>

<sup>1</sup> Faculty of Chemistry, University of Wrocław, Joliot-Curie 14, 50-383 Wrocław, Poland,

<sup>2</sup> Institute of Molecular Physics, Polish Academy of Sciences, Smoluchowskiego 17, 60-179 Poznań, Poland

<sup>3</sup> Forschungszentrum Jülich GmbH Jülich Centre for Neutron Science (JCNS) at Heinz Maier-Leibnitz Zentrum (MLZ) Lichtenbergstr. 185748 Garching Germany

\*e-mail: magdalena.rok@chem.uni.wroc.pl

#### CAPTIONS OF FIGURES

**Fig. S1.** Simultaneous curves of thermogravimetric analysis and differential thermal analysis (2 K·min<sup>-1</sup>).

**Fig. S2.** DSC curves of TrMP·CLA on heating and cooling runs.

**Fig. S3.** The hydrogen bonding ring motifs between tetramethylpyrazine and chloranilic acid (**3a**); the graph set  $R_2^2(10)$  is assigned to the ring motif formed by two CLA<sup>-</sup> molecules, the  $R_2^2(8)$  (green) and  $R_1^2(4)$  (green–orange) motifs present interaction between TrMPH<sup>+</sup> cations and CLA<sup>-</sup> anions, the  $R_2^2(13)$  (dark blue) and  $R_4^4(20)$  (orange) rings are built by the unconventional hydrogen bonds.

**Fig. S4.** Quasielastic spectra of TrMP·CLA (**3b**). Sample temperatures T = 80 and 180 K. Solid lines are fitted with Dirac, Lorentzian components and resolution function obtained for vanadium.

**Fig. S5.** The temperature dependence of the <sup>1</sup>H NMR spin–lattice relaxation time ( $T_1$ ) for TrMP·BRA (**4**) (triangles) and 2MP·CLA (**1**) (circles).

**Fig. S6.** Infrared spectra of the powdered (**1**), (**2**), (**3a**), (**4**) complexes in KBr pellets at 300K: between 50 and 4000 cm<sup>-1</sup>.

**Fig. S7.** Raman spectra of the powdered (**1**), (**2**), (**3a**), (**4**) complexes in KBr pellets at 300K: between 50 and 4000 cm<sup>-1</sup>.

#### CAPTION OF TABLES

**Table S1.** Crystal data and structure refinement for all complexes.

**Table S2.** Experimental and calculated (by using various models) bond lengths and angles 2MP·CLA (**1**) complex. (Å, °).

**Table S3.** Experimental and calculated (by using various models) bond lengths and angles 2MP·BRA (**2**) complex. (Å, °)

**Table S4.** Experimental and calculated (by using various models) bond lengths and angles TrMP·CLA (**3a**) complex. (Å, °)

**Table S5.** Experimental and calculated (by using various models) bond lengths and angles TrMP·CLA (**3b**) complex. (Å, °)

**Table S6.** Experimental and calculated (by using various models) bond lengths and angles TrMP·BRA (**4**) complex. (Å, °)

**Table S7.** Hydrogen bonds and short contacts for crystals (**1**) and (**2**) at 120 and 100 K, respectively.

**Table S8.** Hydrogen bonds and short contacts for crystals (**3a**) at 200 K.

**Table S9.** Hydrogen bonds and short contacts for crystals (**3b**) at 100 K.

**Table S10.** Hydrogen bonds and short contacts for crystals (**4**) at 100 K.

**Table S11.** Calculated and experimental frequencies for the 2MP·CLA (**1**) complex.

**Table S12.** Calculated and experimental frequencies for the 2MP·BRA (**2**) complex.

**Table S13.** Calculated and experimental frequencies for the TrMP·CLA (**3a**) complex.

**Table S14.** Calculated and experimental frequencies for the TrMP·BRA (**4**) complex.

**Table S15.** Comparison of the hydrogen bonds geometry with tunnelling frequencies and tunnelling activation energies for known supramolecular complexes of methyl derivatives of pyrazine. PT-the proton transfer, HB- the hydrogen bond without proton transfer, a,b- the number of protonated nitrogen atoms in pyrazine ring.

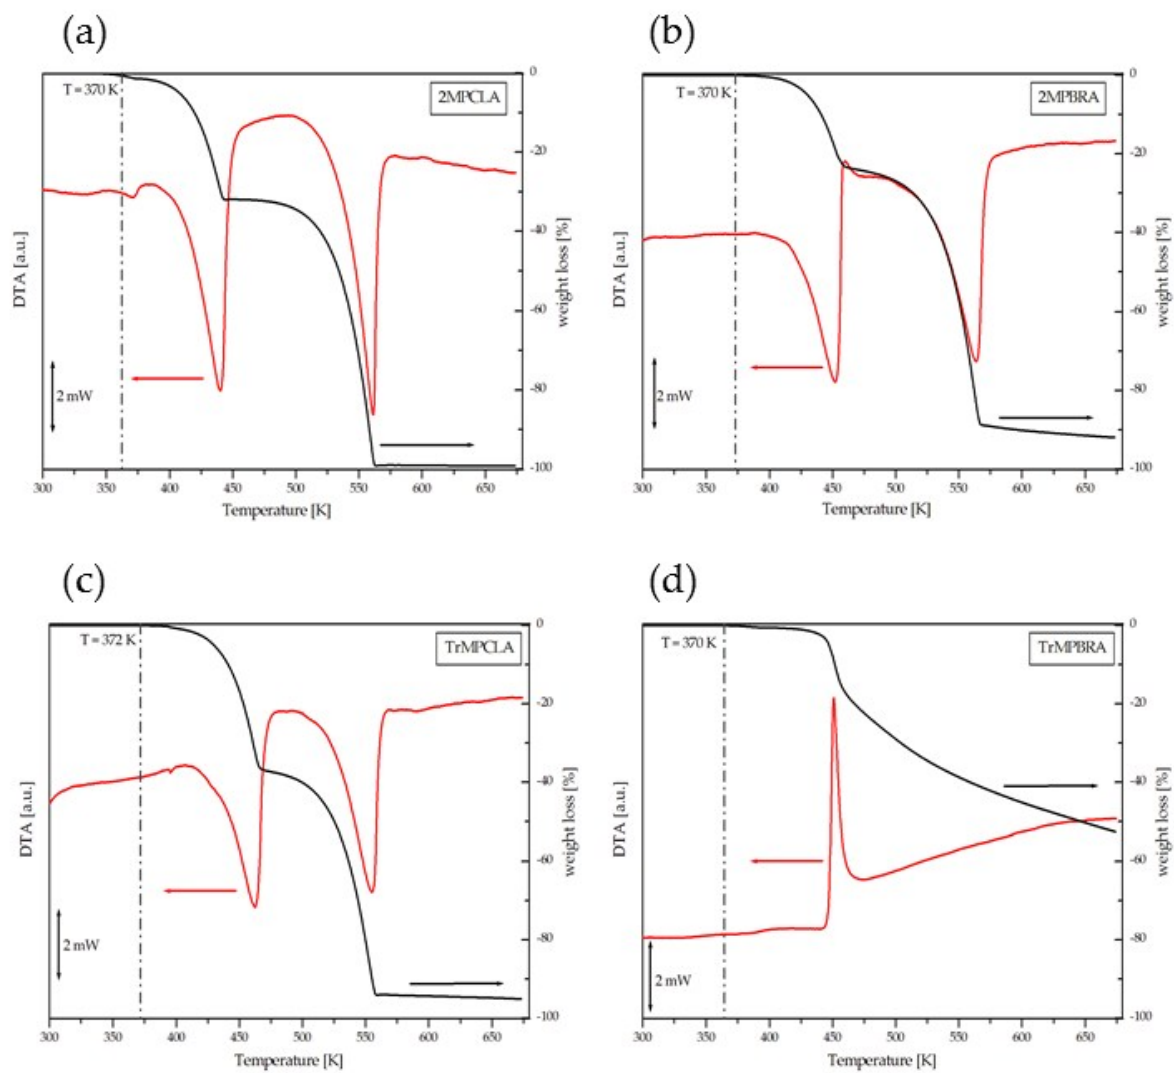

**Fig. S1.** Simultaneous curves of thermogravimetric analysis and differential thermal analysis ( $2 \text{ K min}^{-1}$ ).

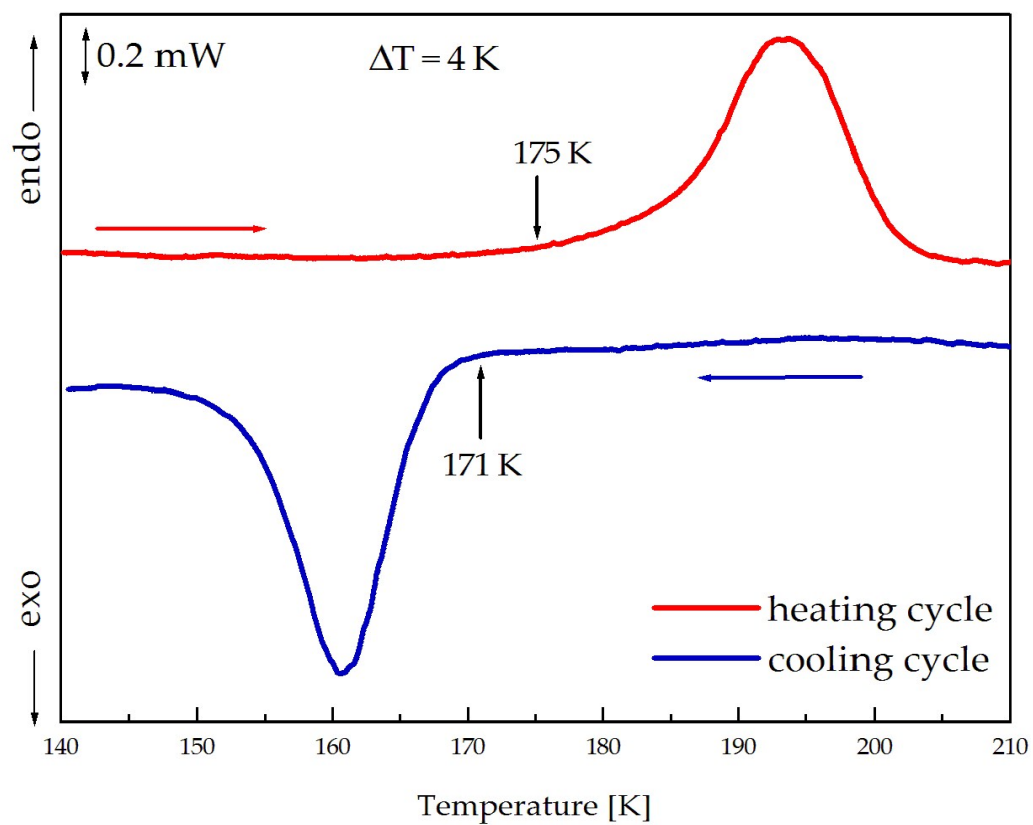

**Fig. S2.** DSC curves of TrMP-CLA on heating and cooling runs.

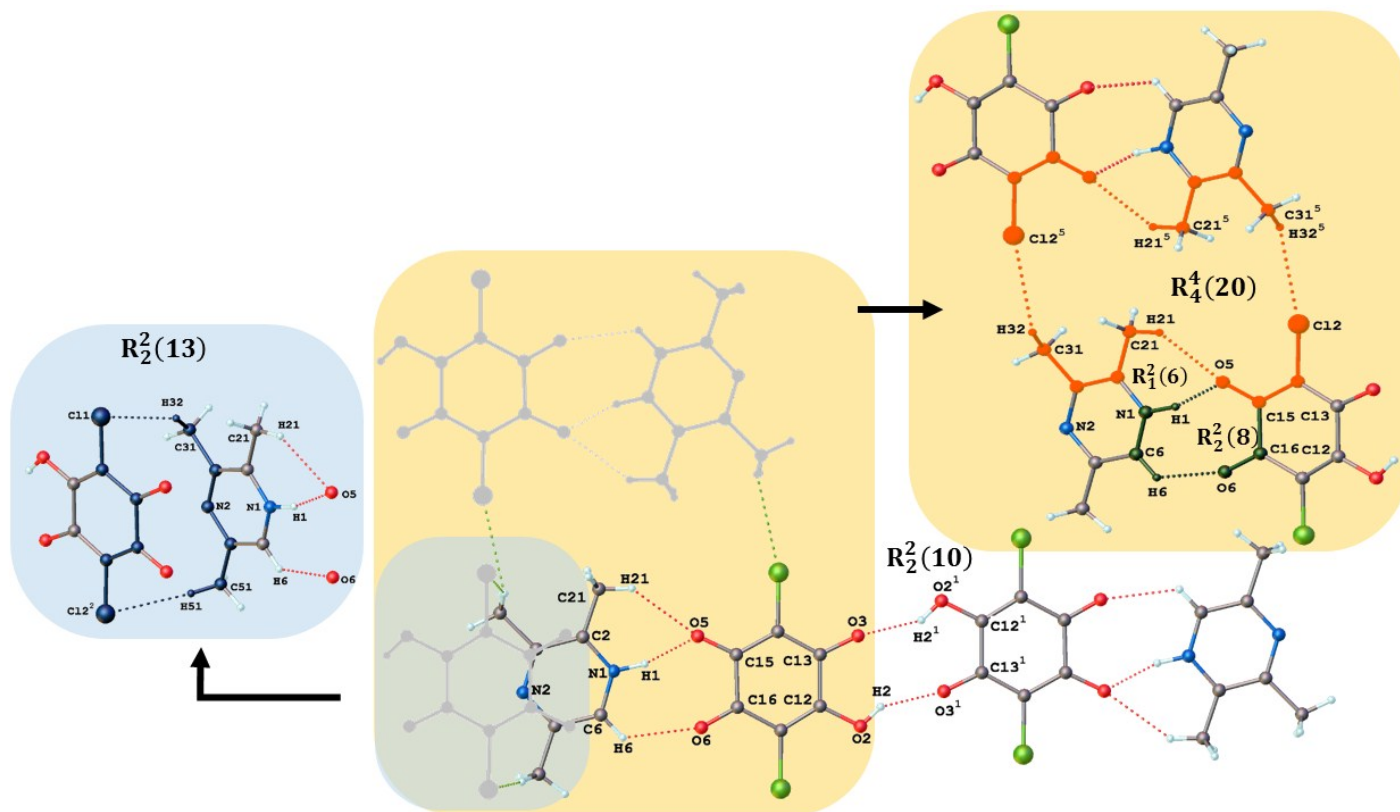

**Fig. S3.** The hydrogen bonding ring motifs between tetramethylpyrazine and chloranilic acid (**3a**); the graph set  $R_2^2(10)$  is assigned to the ring motif formed by two CLA<sup>-</sup> molecules, the  $R_2^2(8)$  (green) and  $R_1^1(4)$  (green–orange) motifs present interaction between TrMPH<sup>+</sup> cations and CLA<sup>-</sup> anions, the  $R_2^2(13)$  (dark blue) and  $R_4^4(20)$  (orange) rings are built by the unconventional hydrogen bonds.

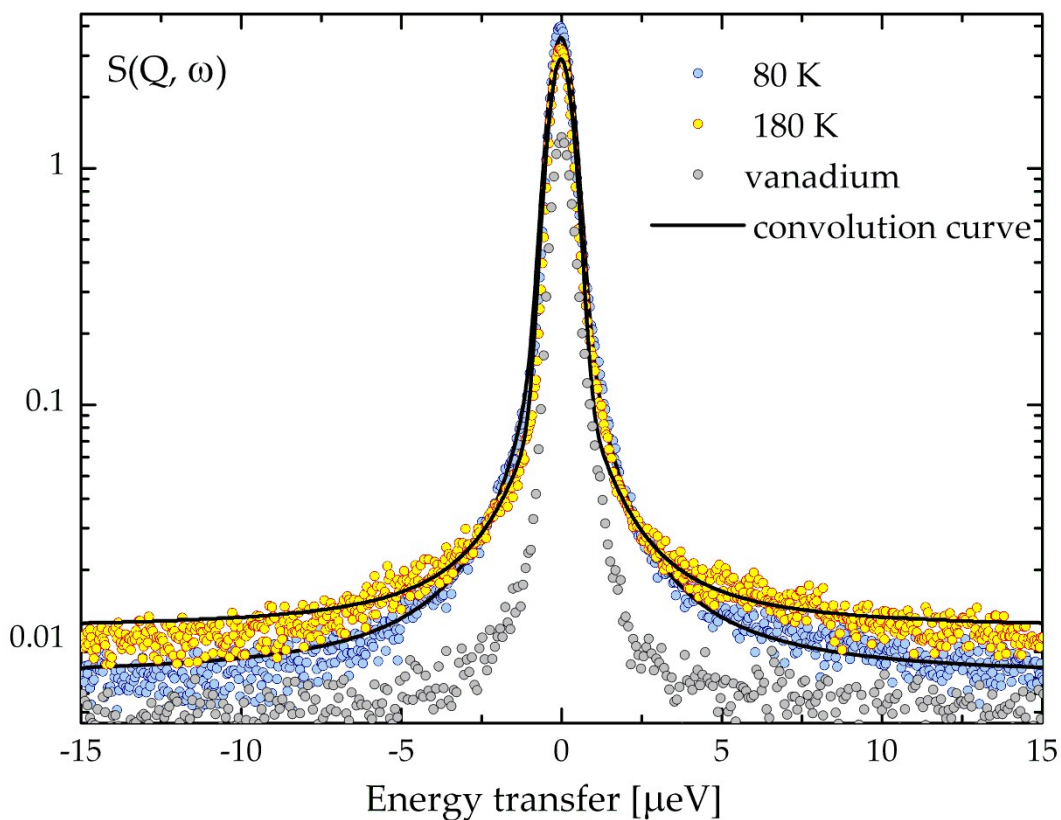

**Fig. S4.** Quasielastic spectra of TrMP·CLA (**3b**). Sample temperatures  $T = 80$  and  $180$  K. Solid lines are fitted with Dirac, Lorentzian components and resolution function obtained for vanadium.

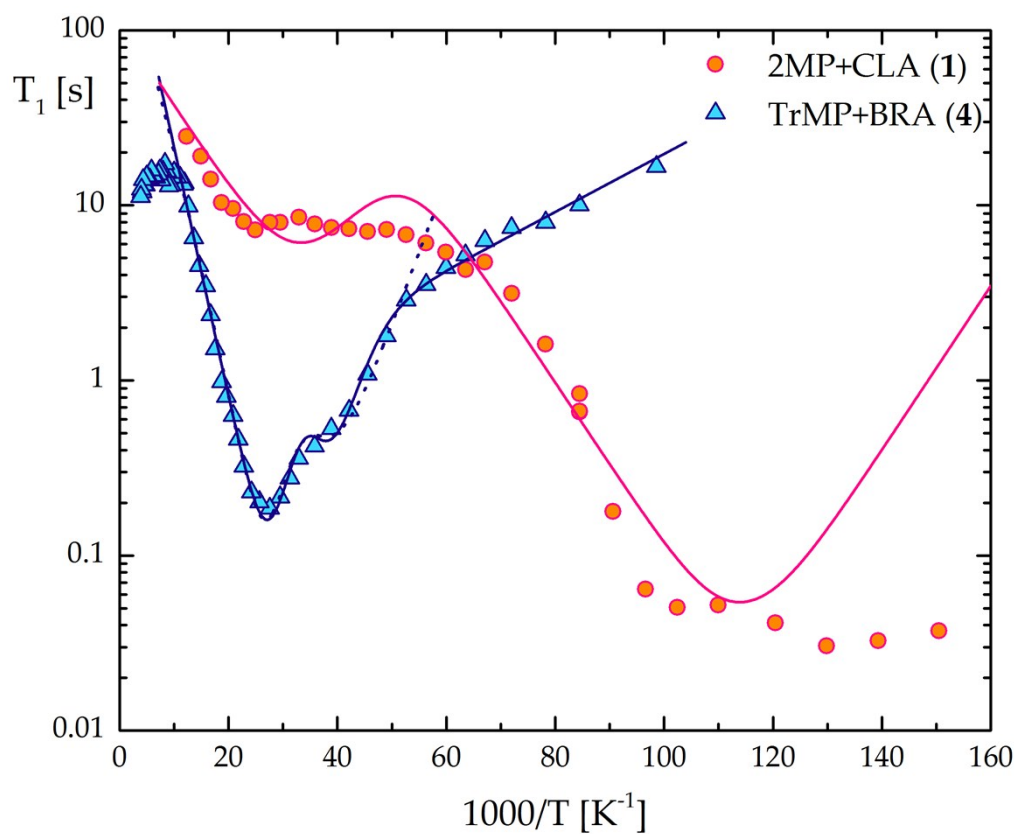

**Fig. S5.** The temperature dependence of the  $^1\text{H}$  NMR spin–lattice relaxation time ( $T_1$ ) for TrMP BRA (**4**) (triangles) and 2MP CLA (**1**) (circles).

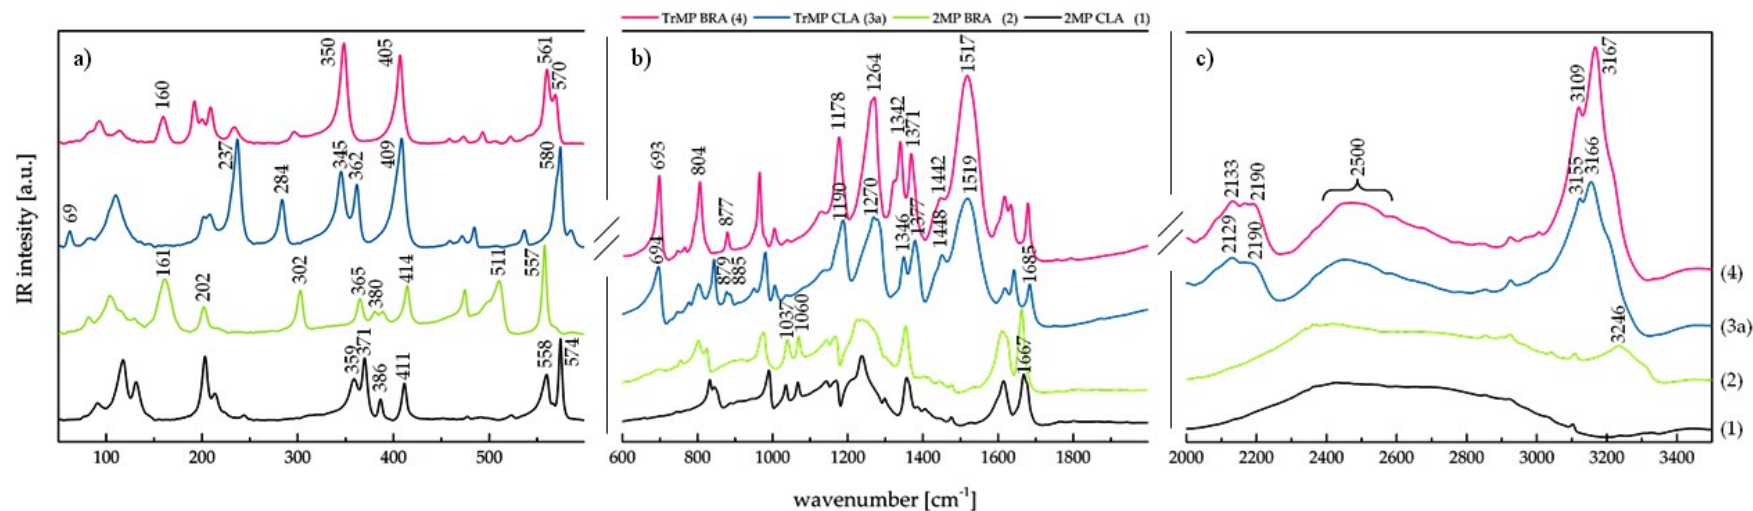

Fig. S6. Infrared spectra of the powdered (1), (2), (3a), (4) complexes in KBr pellets at 300K: between 50 and 4000  $\text{cm}^{-1}$ .

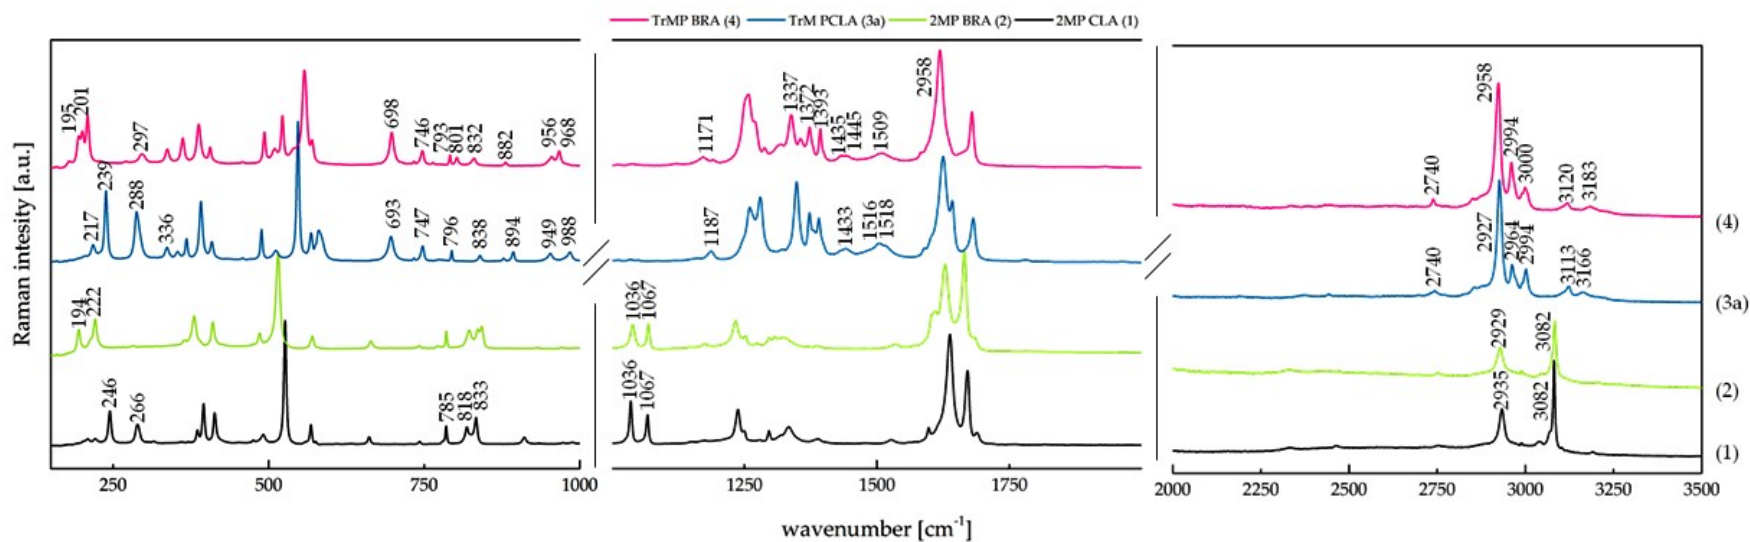

Fig. S7. Raman spectra of the powdered (1), (2), (3a), (4) complexes in KBr pellets at 300K: between 50 and 4000  $\text{cm}^{-1}$ .





**Table S1.** Crystal data and structure refinement for all complexes.

| Complexes:                                                                                                                       | 2MP CLA<br>(1)                                                                     | 2MP BRA<br>(2)                                                               | TrMP CLA<br>(3a)                                                                | TrMP CLA<br>(3b)                                                  | TrMP BRA<br>(4)                                                                 |
|----------------------------------------------------------------------------------------------------------------------------------|------------------------------------------------------------------------------------|------------------------------------------------------------------------------|---------------------------------------------------------------------------------|-------------------------------------------------------------------|---------------------------------------------------------------------------------|
| Formula                                                                                                                          | C <sub>11</sub> H <sub>8</sub> Cl <sub>2</sub> N <sub>2</sub> O <sub>4</sub>       | C <sub>11</sub> H <sub>8</sub> Br <sub>2</sub> N <sub>2</sub> O <sub>4</sub> | C <sub>13</sub> H <sub>12</sub> Cl <sub>2</sub> N <sub>2</sub> O <sub>4</sub>   |                                                                   | C <sub>13</sub> H <sub>12</sub> Br <sub>2</sub> N <sub>2</sub> O <sub>4</sub>   |
| Formula weight                                                                                                                   | 303.09                                                                             | 392.01                                                                       | 331.16                                                                          |                                                                   | 420.06                                                                          |
| T (K)                                                                                                                            | 120(2)                                                                             | 100(2)                                                                       | 200(2)                                                                          | 100(2)                                                            | 100(2)                                                                          |
| $\lambda$ [Å]                                                                                                                    | 0.71073                                                                            |                                                                              |                                                                                 |                                                                   |                                                                                 |
| Crystal system                                                                                                                   | monoclinic                                                                         | monoclinic                                                                   | triclinic                                                                       | triclinic                                                         | triclinic                                                                       |
| Space group                                                                                                                      | <i>P</i> 2 <sub>1</sub> / <i>c</i>                                                 | <i>C</i> 2/ <i>c</i>                                                         | <i>P</i> -1                                                                     | <i>P</i> -1                                                       | <i>P</i> -1                                                                     |
| <i>a</i> (Å)                                                                                                                     | 6.711(2)                                                                           | 20.001(2)                                                                    | 8.463(3)                                                                        | 13.379(7)                                                         | 8.450(4)                                                                        |
| <i>b</i> (Å)                                                                                                                     | 14.834(5)                                                                          | 4.845(4)                                                                     | 8.976(3)                                                                        | 14.992(3)                                                         | 9.153(2)                                                                        |
| <i>c</i> (Å)                                                                                                                     | 12.391(4)                                                                          | 16.024(4)                                                                    | 10.962(4)                                                                       | 16.043(4)                                                         | 10.952(4)                                                                       |
| $\alpha$ (°)                                                                                                                     | 90                                                                                 | 90                                                                           | 95.57(2)                                                                        | 113.90(4)                                                         | 67.50(3)                                                                        |
| $\beta$ (°)                                                                                                                      | 104.88(3)                                                                          | 125.35(3)                                                                    | 111.82(3)                                                                       | 103.69(3)                                                         | 67.45(2)                                                                        |
| $\gamma$ (°)                                                                                                                     | 90                                                                                 | 90                                                                           | 109.33(2)                                                                       | 98.24(2)                                                          | 72.56(3)                                                                        |
| <i>V</i> (Å <sup>3</sup> )                                                                                                       | 1192(2)                                                                            | 1266(3)                                                                      | 706(2)                                                                          | 2746(4)                                                           | 711(2)                                                                          |
| <i>Z</i>                                                                                                                         | 4                                                                                  | 4                                                                            | 2                                                                               | 8                                                                 | 2                                                                               |
| $\mu$ (Mo K $\alpha$ )<br>(mm <sup>-1</sup> )                                                                                    | 0.56                                                                               | 6.41                                                                         | 0.48                                                                            | 0.49                                                              | 5.72                                                                            |
| Crystal size<br>(mm <sup>3</sup> )                                                                                               | 0.49×0.35×0.10                                                                     | 0.15×0.11×0.04                                                               | 0.68×0.36×0.12                                                                  | 0.72×0.37×0.08                                                    | 0.24×0.19×0.12                                                                  |
| $\theta$ Range (°)                                                                                                               | 3.1 to 36.7                                                                        | 3.1 to 36.4                                                                  | 2.9 to 36.6                                                                     | 3.1 to 36.4                                                       | 3.7 to 36.6                                                                     |
| Index ranges                                                                                                                     | -7 ≤ <i>h</i> ≤ 8<br>-17 ≤ <i>k</i> ≤ 17<br>-12 ≤ <i>l</i> ≤ 15                    | -25 ≤ <i>h</i> ≤ 25,<br>-6 ≤ <i>k</i> ≤ 6,<br>-20 ≤ <i>l</i> ≤ 20            | -10 ≤ <i>h</i> ≤ 8,<br>11 ≤ <i>k</i> ≤ 11,<br>-14 ≤ <i>l</i> ≤ 14               | -16 ≤ <i>h</i> ≤ 16<br>-16 ≤ <i>k</i> ≤ 18<br>-19 ≤ <i>l</i> ≤ 19 | -10 ≤ <i>h</i> ≤ 10<br>-11 ≤ <i>k</i> ≤ 11<br>-14 ≤ <i>l</i> ≤ 13               |
| Absorption correction                                                                                                            | none                                                                               | analytical                                                                   | analytical                                                                      | analytical                                                        | analytical                                                                      |
| T <sub>min</sub> , T <sub>max</sub>                                                                                              | -                                                                                  | 0.569, 0.817                                                                 | 0.797, 0.951                                                                    | 0.799, 0.966                                                      | 0.431, 0.644                                                                    |
| No. of measured,<br>independent and<br>observed<br>[ <i>I</i> > 2σ( <i>I</i> )]<br>reflections                                   | 4947, 2198, 1943                                                                   | 5110, 1451, 1341                                                             | 9923, 3238, 2776                                                                | 25077, 10236, 6857                                                | 9479, 3247, 2920                                                                |
| <i>R</i> <sub>int</sub>                                                                                                          | 0.018                                                                              | 0.047                                                                        | 0.041                                                                           | 0.042                                                             | 0.029                                                                           |
| Goodness-of-fit<br>on <i>F</i> <sup>2</sup>                                                                                      | 1.13                                                                               | 1.23                                                                         | 1.07                                                                            | 1.04                                                              | 1.07                                                                            |
| Final <i>R</i> <sub><i>i</i></sub> , <i>wR</i> <sub>2</sub><br>indices<br>[ <i>F</i> <sup>2</sup> > 2σ( <i>F</i> <sup>2</sup> )] | <i>R</i> <sub>1</sub> = 0.033,<br><i>wR</i> <sub>2</sub> = 0.079                   | <i>R</i> <sub>1</sub> = 0.038,<br><i>wR</i> <sub>2</sub> = 0.090             | <i>R</i> <sub>1</sub> = 0.046,<br><i>wR</i> <sub>2</sub> = 0.126                | <i>R</i> <sub>1</sub> = 0.056,<br><i>wR</i> <sub>2</sub> = 0.141  | <i>R</i> <sub>1</sub> = 0.027,<br><i>wR</i> <sub>2</sub> = 0.074                |
| Final <i>R</i> <sub><i>i</i></sub> , <i>wR</i> <sub>2</sub><br>indices (all data)                                                | <i>R</i> <sub>1</sub> = 0.039,<br><i>wR</i> <sub>2</sub> = 0.081                   | <i>R</i> <sub>1</sub> = 0.041,<br><i>wR</i> <sub>2</sub> = 0.092             | <i>R</i> <sub>1</sub> = 0.053,<br><i>wR</i> <sub>2</sub> = 0.133                | <i>R</i> <sub>1</sub> = 0.090,<br><i>wR</i> <sub>2</sub> = 0.156  | <i>R</i> <sub>1</sub> = 0.031,<br><i>wR</i> <sub>2</sub> = 0.077                |
| H-atom treatment                                                                                                                 | H atoms treated by<br>a mixture of<br>independent and<br>constrained<br>refinement | H-atom parameters<br>constrained                                             | H atoms treated by a<br>mixture of independent<br>and constrained<br>refinement | H-atom parameters<br>constrained                                  | H atoms treated by a<br>mixture of independent<br>and constrained<br>refinement |
| $\Delta\rho_{\max, \min}$ (e Å <sup>-3</sup> )                                                                                   | 0.33/-0.31                                                                         | 0.52/-0.61                                                                   | 0.46/-0.28                                                                      | 0.60/-0.38                                                        | 0.71/-0.51                                                                      |

**Table S2.** Experimental and calculated (on the DFT method level in the solid state) bond lengths (Å) and angles (°) 2MP·CLA (**1**) complex.

|             | Experimental | Calculated |
|-------------|--------------|------------|
| <b>2MP</b>  |              |            |
| N(1)–C(2)   | 1.349(3)     | 1.348      |
| N(1)–C(6)   | 1.347(3)     | 1.348      |
| N(2)–C(5)   | 1.338(3)     | 1.341      |
| N(2)–C(3)   | 1.342(3)     | 1.341      |
| C(5)–C(6)   | 1.378(3)     | 1.387      |
| C(2)–C(3)   | 1.395(3)     | 1.401      |
| C(2)–C(21)  | 1.496(3)     | 1.488      |
| N1–C2–C3    | 119.55(18)   | 121.01     |
| N1–C2–C21   | 119.46(18)   | 122.65     |
| C2–N1–C6    | 117.76(17)   | 117.24     |
| C3–N2–C5    | 116.93(18)   | 117.24     |
| N2–C5–C6    | 121.44(19)   | 121.01     |
| N2–C3–C2    | 122.61(18)   | 121.01     |
| N1–C6–C5    | 121.69(19)   | 121.72     |
| C3–C2–C21   | 120.98(18)   | 122.64     |
| <b>CLA</b>  |              |            |
| Cl(1)–C(11) | 1.718(2)     | 1.773      |
| Cl(2)–C(14) | 1.719(2)     | 1.779      |
| C(13)–O(3)  | 1.217(2)     | 1.237      |
| C(12)–O(2)  | 1.322(2)     | 1.283      |
| C(15)–O(5)  | 1.323(2)     | 1.333      |
| C(16)–O(6)  | 1.220(2)     | 1.253      |
| C(14)–C(15) | 1.348(3)     | 1.389      |
| C(14)–C(13) | 1.458(3)     | 1.426      |
| C(15)–C(16) | 1.506(3)     | 1.543      |
| C(16)–C(11) | 1.460(3)     | 1.447      |
| C(12)–C(11) | 1.349(3)     | 1.362      |
| C(12)–C(13) | 1.515(3)     | 1.509      |
| O2–C12–C11  | 121.88(18)   | 122.60     |
| O2–C12–C13  | 117.34(17)   | 116.36     |
| O3–C13–C14  | 124.16(18)   | 126.01     |
| O3–C13–C12  | 118.20(17)   | 116.14     |
| O5–C15–C14  | 122.36(18)   | 124.46     |
| O5–C15–C16  | 116.77(17)   | 117.46     |
| O6–C16–C15  | 118.27(17)   | 118.38     |
| O6–C16–C11  | 123.81(18)   | 123.54     |
| C11–C16–C15 | 117.92(16)   | 118.06     |
| C11–C12–C13 | 120.77(17)   | 121.01     |
| C12–C11–Cl1 | 122.34(15)   | 119.32     |
| C12–C11–C16 | 121.29(18)   | 121.76     |
| C13–C14–C12 | 117.79(15)   | 116.19     |
| C14–C15–C16 | 120.87(17)   | 121.02     |
| C14–C13–C12 | 117.64(17)   | 118.07     |
| C15–C14–C12 | 120.70(15)   | 120.56     |
| C15–C14–C13 | 121.51(18)   | 123.23     |
| C16–C11–Cl1 | 116.36(14)   | 118.86     |

**Table S3.** Experimental and calculated (on the DFT method level in the solid state) bond lengths (Å) and angles (°) 2MP·BRA (2) complex.

|                                                              | Experimental | Calculated |
|--------------------------------------------------------------|--------------|------------|
| <b>2MP</b>                                                   |              |            |
| N(1)–C(2)                                                    | 1.338(5)     | 1.352      |
| N(1)–C(3)                                                    | 1.331(5)     | 1.344      |
| C(3)–C(2) <sup>2</sup>                                       | 1.395(6)     | 1.389      |
| C(2)–C(3) <sup>2</sup>                                       | 1.395(6)     | 1.389      |
| C(2)–C(21)                                                   | 1.496(9)     | 1.495      |
| N1–C2–C3 <sup>2</sup>                                        | 120.6(4)     | 119.40     |
| N1–C3–C2 <sup>2</sup>                                        | 122.1(4)     | 120.79     |
| N1–C2–C21                                                    | 119.0(5)     | 119.27     |
| C2–N1–C3                                                     | 117.3(3)     | 118.05     |
| <b>BRA</b>                                                   |              |            |
| Br(1)–C(11)                                                  | 1.881(4)     | 1.902      |
| C(13)–O(3)                                                   | 1.215(5)     | 1.241      |
| C(12)–O(2)                                                   | 1.319(5)     | 1.318      |
| C(11)–C(13) <sup>1</sup>                                     | 1.453 (5)    | 1.443      |
| C(11)–C(12)                                                  | 1.353(5)     | 1.352      |
| C(13)–C(11) <sup>1</sup>                                     | 1.453(5)     | 1.443      |
| C(13)–C(12)                                                  | 1.521(5)     | 1.521      |
| O2–C12–C11                                                   | 122.1(4)     | 121.94     |
| O2–C12–C13                                                   | 117.7(3)     | 118.04     |
| O3–C13–C11 <sup>1</sup>                                      | 124.6 (4)    | 124.39     |
| O3–C13–C12                                                   | 117.7(3)     | 117.54     |
| C11 <sup>1</sup> –C13–C12                                    | 117.7 (3)    | 118.03     |
| C11–C12–C13                                                  | 120.1(3)     | 119.97     |
| C12–C11–C13 <sup>1</sup>                                     | 122.2(3)     | 121.98     |
| C13 <sup>1</sup> –C11–Br1                                    | 116.8 (3)    | 117.44     |
| Symmetry code: (1) -x+1/2, -y-1/2, -z+1; (2) -x, -y+1, -z+1. |              |            |

**Table S4.** Experimental and calculated (on the DFT method level in the solid state) bond lengths (Å) and angles (°) TrMP·CLA (**3a**) complex.

|                          | Experimental | Calculated |
|--------------------------|--------------|------------|
| <b>TrMPH<sup>+</sup></b> |              |            |
| N(1)–C(2)                | 1.345(2)     | 1.352      |
| N(1)–C(6)                | 1.338(2)     | 1.351      |
| N(2)–C(3)                | 1.333(2)     | 1.342      |
| N(2)–C(5)                | 1.351(2)     | 1.353      |
| C(5)–C(6)                | 1.385(2)     | 1.388      |
| C(2)–C(3)                | 1.411(2)     | 1.415      |
| C(2)–C(21)               | 1.490(2)     | 1.486      |
| C(3)–C(31)               | 1.500(2)     | 1.491      |
| C(5)–C(51)               | 1.489(3)     | 1.492      |
| N1–C2–C3                 | 116.89(16)   | 116.87     |
| N1–C2–C21                | 119.54(16)   | 120.02     |
| C2–N1–C6                 | 122.15(15)   | 122.46     |
| C3–N2–C5                 | 119.64(15)   | 120.06     |
| N2–C5–C6                 | 119.77(16)   | 120.00     |
| N2–C3–C2                 | 121.71(15)   | 121.32     |
| N1–C6–C5                 | 119.81(16)   | 119.23     |
| C3–C2–C21                | 123.56(16)   | 123.08     |
| N2–C3–C31                | 117.95(15)   | 118.29     |
| C2–C3–C31                | 120.34(16)   | 120.39     |
| N2–C5–C51                | 118.23(16)   | 118.07     |
| C6–C5–C51                | 121.99(16)   | 121.92     |
| <b>CLA<sup>-</sup></b>   |              |            |
| Cl(1)–C(11)              | 1.717(2)     | 1.779      |
| Cl(2)–C(14)              | 1.729(2)     | 1.787      |
| C(13)–O(3)               | 1.242(2)     | 1.263      |
| C(12)–O(2)               | 1.328(2)     | 1.329      |
| C(15)–O(5)               | 1.255(2)     | 1.266      |
| C(16)–O(6)               | 1.220(2)     | 1.238      |
| C(14)–C(15)              | 1.391(2)     | 1.398      |
| C(14)–C(13)              | 1.411(2)     | 1.408      |
| C(15)–C(16)              | 1.542(2)     | 1.554      |
| C(16)–C(11)              | 1.450(2)     | 1.439      |
| C(12)–C(11)              | 1.351(2)     | 1.361      |
| C(12)–C(13)              | 1.509(2)     | 1.514      |
| O2–C12–C11               | 121.63(15)   | 121.97     |
| O2–C12–C13               | 116.62(13)   | 116.69     |
| O3–C13–C12               | 116.10(14)   | 116.68     |
| O3–C13–C14               | 125.45(15)   | 125.22     |
| O5–C15–C14               | 125.66(15)   | 126.11     |
| O5–C15–C16               | 116.73(14)   | 116.59     |
| O6–C16–C11               | 123.03(15)   | 121.09     |
| O6–C16–C15               | 117.81(15)   | 117.54     |
| C11–C16–C15              | 119.15(14)   | 118.36     |
| C11–C12–C13              | 121.73(14)   | 121.32     |
| C12–C11–C11              | 121.87(13)   | 120.91     |
| C12–C11–C16              | 120.13(14)   | 121.01     |
| C13–C14–C12              | 117.54(12)   | 117.38     |

|             |            |        |
|-------------|------------|--------|
| C14-C15-C16 | 117.61(14) | 117.39 |
| C14-C13-C12 | 118.45(14) | 118.06 |
| C15-C14-C12 | 119.71(12) | 119.31 |
| C15-C14-C13 | 122.74(14) | 123.29 |
| C16-C11-C11 | 117.93(12) | 117.88 |

**Table S5.** Experimental bond lengths (Å) and angles (°) for the TrMP·CLA (**3b**) complex.

| ionic pair A             |              | ionic pair B             |              | ionic pair C             |              | ionic pair D             |              |
|--------------------------|--------------|--------------------------|--------------|--------------------------|--------------|--------------------------|--------------|
|                          | experimental |                          | experimental |                          | experimental |                          | experimental |
| <b>TrMPH<sup>+</sup></b> |              | <b>TrMPH<sup>+</sup></b> |              | <b>TrMPH<sup>+</sup></b> |              | <b>TrMPH<sup>+</sup></b> |              |
| N(1A)–C(2A)              | 1.345(4)     | N(1B)–C(2B)              | 1.341(4)     | N(1C)–C(2C)              | 1.332(4)     | N(1D)–C(2D)              | 1.333(4)     |
| N(1A)–C(6A)              | 1.340(4)     | N(1B)–C(6B)              | 1.340(4)     | N(1C)–C(6C)              | 1.348(4)     | N(1D)–C(6D)              | 1.345(4)     |
| N(2A)–C(3A)              | 1.331(4)     | N(2B)–C(3B)              | 1.332(4)     | N(2C)–C(3C)              | 1.330(4)     | N(2D)–C(3D)              | 1.327(4)     |
| N(2A)–C(5A)              | 1.343(4)     | N(2B)–C(5B)              | 1.351(4)     | N(2C)–C(5C)              | 1.342(4)     | N(2D)–C(5D)              | 1.348(4)     |
| C(2A)–C(3A)              | 1.407(5)     | C(2B)–C(3B)              | 1.409(5)     | C(2C)–C(3C)              | 1.415(5)     | C(2D)–C(3D)              | 1.411(5)     |
| C(2A)–C(21A)             | 1.494(5)     | C(2B)–C(21B)             | 1.490(5)     | C(2C)–C(21C)             | 1.487(4)     | C(2D)–C(21D)             | 1.486(5)     |
| C(3A)–C(31A)             | 1.499(5)     | C(3B)–C(31B)             | 1.492(5)     | C(3C)–C(31C)             | 1.492(4)     | C(3D)–C(31D)             | 1.500(5)     |
| C(5A)–C(6A)              | 1.388(5)     | C(5B)–C(6B)              | 1.381(5)     | C(5C)–C(6C)              | 1.390(5)     | C(5D)–C(6D)              | 1.388(5)     |
| C(5A)–C(51A)             | 1.490(5)     | C(5B)–C(51B)             | 1.495(5)     | C(5C)–C(51C)             | 1.487(5)     | C(5D)–C(51D)             | 1.491(5)     |
| N(1A)–C(2A)–C(3A)        | 116.8(3)     | C(2B)–N(1B)–C(6B)        | 122.7(3)     | C(2C)–N(1C)–C(6C)        | 122.7(3)     | C(2D)–N(1D)–C(6D)        | 123.5(3)     |
| N(1A)–C(2A)–C(21A)       | 119.4(3)     | C(3B)–N(2B)–C(5B)        | 119.3(3)     | C(3C)–N(2C)–C(5C)        | 120.2(3)     | C(3D)–N(2D)–C(5D)        | 119.3(3)     |
| C(2A)–N(1A)–C(6A)        | 122.3(3)     | N(1B)–C(2B)–C(3B)        | 116.6(3)     | N(1C)–C(2C)–C(3C)        | 116.6(3)     | N(1D)–C(2D)–C(3D)        | 116.2(3)     |
| C(3A)–N(2A)–C(5A)        | 119.7(3)     | N(1B)–C(2B)–C(21B)       | 120.2(3)     | N(1C)–C(2C)–C(21C)       | 120.2(3)     | N(1D)–C(2D)–C(21D)       | 120.1(3)     |
| C(3A)–C(2A)–C(21A)       | 123.8(3)     | C(3B)–C(2B)–C(21B)       | 123.3(3)     | C(3C)–C(2C)–C(21C)       | 123.2(3)     | C(3D)–C(2D)–C(21D)       | 123.7(3)     |
| N(2A)–C(3A)–C(2A)        | 121.8(3)     | N(2B)–C(3B)–C(2B)        | 122.0(3)     | N(2C)–C(3C)–C(2C)        | 121.7(3)     | N(2D)–C(3D)–C(2D)        | 122.3(3)     |
| N(2A)–C(3A)–C(31A)       | 118.4(3)     | N(2B)–C(3B)–C(31B)       | 118.4(3)     | N(2C)–C(3C)–C(31C)       | 118.8(3)     | N(2D)–C(3D)–C(31D)       | 118.1(3)     |
| C(2A)–C(3A)–C(31A)       | 119.7(3)     | C(2B)–C(3B)–C(31B)       | 119.7(3)     | C(2C)–C(3C)–C(31C)       | 119.5(3)     | C(2D)–C(3D)–C(31D)       | 119.6(3)     |
| N(2A)–C(5A)–C(6A)        | 120.1(3)     | N(2B)–C(5B)–C(6B)        | 120.4(3)     | N(2C)–C(5C)–C(6C)        | 119.5(3)     | N(2D)–C(5D)–C(6D)        | 120.4(3)     |
| N(2A)–C(5A)–C(51A)       | 117.6(3)     | N(2B)–C(5B)–C(51B)       | 117.9(3)     | N(2C)–C(5C)–C(51C)       | 118.7(3)     | N(2D)–C(5D)–C(51D)       | 117.9(3)     |
| C(6A)–C(5A)–C(51A)       | 122.3(3)     | C(6B)–C(5B)–C(51B)       | 121.7(3)     | C(6C)–C(5C)–C(51C)       | 121.7(3)     | C(6D)–C(5D)–C(51D)       | 121.7(3)     |
| N(1A)–C(6A)–C(5A)        | 119.2(3)     | N(1B)–C(6B)–C(5B)        | 119.1(3)     | N(1C)–C(6C)–C(5C)        | 119.2(3)     | N(1D)–C(6D)–C(5D)        | 118.3(3)     |
| <b>CLA<sup>-</sup></b>   |              | <b>CLA<sup>-</sup></b>   |              | <b>CLA<sup>-</sup></b>   |              | <b>CLA<sup>-</sup></b>   |              |
| Cl(1A)–C(11A)            | 1.720(3)     | Cl(1B)–C(11B)            | 1.716(3)     | Cl(1C)–C(11C)            | 1.716(3)     | Cl(1D)–C(11D)            | 1.713(3)     |
| Cl(2A)–C(14A)            | 1.727(3)     | Cl(2B)–C(14B)            | 1.732(3)     | Cl(2C)–C(14C)            | 1.730(4)     | Cl(2D)–C(14D)            | 1.727(3)     |
| C(12A)–O(2A)             | 1.325(4)     | C(12B)–O(2B)             | 1.324(4)     | C(12C)–O(2C)             | 1.326(4)     | C(12D)–O(2D)             | 1.327(4)     |
| C(13A)–O(3A)             | 1.250(4)     | C(13B)–O(3B)             | 1.250(4)     | C(13C)–O(3C)             | 1.255(4)     | C(13D)–O(3D)             | 1.248(4)     |
| C(15A)–O(5A)             | 1.252(4)     | C(15B)–O(5B)             | 1.264(4)     | C(15C)–O(5C)             | 1.254(4)     | C(15D)–O(5D)             | 1.257(4)     |
| C(16A)–O(6A)             | 1.229(4)     | C(16B)–O(6B)             | 1.231(4)     | C(16C)–O(6C)             | 1.216(4)     | C(16D)–O(6D)             | 1.217(4)     |
| C(11A)–C(12A)            | 1.349(5)     | C(11B)–C(12B)            | 1.356(4)     | C(11C)–C(12C)            | 1.351(5)     | C(11D)–C(12D)            | 1.355(5)     |
| C(11A)–C(16A)            | 1.456(5)     | C(11B)–C(16B)            | 1.438(5)     | C(11C)–C(16C)            | 1.461(5)     | C(11D)–C(16D)            | 1.461(5)     |
| C(12A)–C(13A)            | 1.516(5)     | C(12B)–C(13B)            | 1.507(5)     | C(12C)–C(13C)            | 1.516(5)     | C(12D)–C(13D)            | 1.498(5)     |
| C(13A)–C(14A)            | 1.402(5)     | C(13B)–C(14B)            | 1.410(5)     | C(13C)–C(14C)            | 1.406(5)     | C(13D)–C(14D)            | 1.417(5)     |
| C(14A)–C(15A)            | 1.401(5)     | C(14B)–C(15B)            | 1.392(5)     | C(14C)–C(15C)            | 1.402(5)     | C(14D)–C(15D)            | 1.395(5)     |
| C(15A)–C(16A)            | 1.537(5)     | C(15B)–C(16B)            | 1.545(5)     | C(15C)–C(16C)            | 1.541(5)     | C(15D)–C(16D)            | 1.541(5)     |
| C(12A)–C(11A)–Cl(1A)     | 122.1(3)     | C(12B)–C(11B)–Cl(1B)     | 121.6(3)     | C(12C)–C(11C)–Cl(1C)     | 121.9(3)     | C(12D)–C(11D)–Cl(1D)     | 122.4(3)     |
| C(12A)–C(11A)–C(16A)     | 120.3(3)     | C(12B)–C(11B)–C(16B)     | 120.1(3)     | C(12C)–C(11C)–C(16C)     | 120.2(3)     | C(12D)–C(11D)–C(16D)     | 119.8(3)     |
| C(16A)–C(11A)–Cl(1A)     | 117.6(2)     | C(16B)–C(11B)–Cl(1B)     | 118.3(2)     | C(16C)–C(11C)–Cl(1C)     | 117.8(2)     | C(16D)–C(11D)–Cl(1D)     | 117.8(3)     |
| O(2A)–C(12A)–C(11A)      | 121.8(3)     | O(2B)–C(12B)–C(11B)      | 121.5(3)     | O(2C)–C(12C)–C(11C)      | 121.9(3)     | O(2D)–C(12D)–C(11D)      | 120.8(3)     |

|                      |          |                      |          |                      |          |                      |          |
|----------------------|----------|----------------------|----------|----------------------|----------|----------------------|----------|
| O(2A)-C(12A)-C(13A)  | 116.9(3) | O(2B)-C(12B)-C(13B)  | 116.8(3) | O(2C)-C(12C)-C(13C)  | 116.5(3) | O(2D)-C(12D)-C(13D)  | 117.0(3) |
| C(11A)-C(12A)-C(13A) | 121.3(3) | C(11B)-C(12B)-C(13B) | 121.7(3) | C(11C)-C(12C)-C(13C) | 121.6(3) | C(11D)-C(12D)-C(13D) | 122.2(3) |
| O(3A)-C(13A)-C(12A)  | 115.7(3) | O(3B)-C(13B)-C(12B)  | 116.3(3) | O(3C)-C(13C)-C(12C)  | 116.5(3) | O(3D)-C(13D)-C(12D)  | 116.7(3) |
| O(3A)-C(13A)-C(14A)  | 125.4(3) | O(3B)-C(13B)-C(14B)  | 125.1(3) | O(3C)-C(13C)-C(14C)  | 125.5(3) | O(3D)-C(13D)-C(14D)  | 124.5(3) |
| C(14A)-C(13A)-C(12A) | 118.8(3) | C(14B)-C(13B)-C(12B) | 118.6(3) | C(14C)-C(13C)-C(12C) | 118.6(3) | C(14D)-C(13D)-C(12D) | 118.7(3) |
| C(13A)-C(14A)-C(12A) | 118.4(2) | C(13B)-C(14B)-C(12B) | 117.9(3) | C(13C)-C(14C)-C(12C) | 118.2(2) | C(13D)-C(14D)-C(12D) | 117.8(3) |
| C(15A)-C(14A)-C(12A) | 118.9(3) | C(15B)-C(14B)-C(12B) | 119.5(3) | C(15C)-C(14C)-C(12C) | 118.9(3) | C(15D)-C(14D)-C(12D) | 119.8(3) |
| C(15A)-C(14A)-C(13A) | 122.7(3) | C(15B)-C(14B)-C(13B) | 122.6(3) | C(15C)-C(14C)-C(13C) | 122.8(3) | C(15D)-C(14D)-C(13D) | 122.4(3) |
| O(5A)-C(15A)-C(14A)  | 125.8(3) | O(5B)-C(15B)-C(14B)  | 126.1(3) | O(5C)-C(15C)-C(14C)  | 126.1(3) | O(5D)-C(15D)-C(14D)  | 125.7(3) |
| O(5A)-C(15A)-C(16A)  | 116.7(3) | O(5B)-C(15B)-C(16B)  | 116.5(3) | O(5C)-C(15C)-C(16C)  | 116.4(3) | O(5D)-C(15D)-C(16D)  | 116.4(3) |
| C(14A)-C(15A)-C(16A) | 117.5(3) | C(14B)-C(15B)-C(16B) | 117.4(3) | C(14C)-C(15C)-C(16C) | 117.5(3) | C(14D)-C(15D)-C(16D) | 117.9(3) |
| O(6A)-C(16A)-C(11A)  | 122.8(3) | O(6B)-C(16B)-C(11B)  | 123.0(3) | O(6C)-C(16C)-C(11C)  | 122.5(3) | O(6D)-C(16D)-C(11D)  | 122.8(3) |
| O(6A)-C(16A)-C(15A)  | 118.0(3) | O(6B)-C(16B)-C(15B)  | 117.4(3) | O(6C)-C(16C)-C(15C)  | 118.5(3) | O(6D)-C(16D)-C(15D)  | 118.3(3) |
| C(11A)-C(16A)-C(15A) | 119.2(3) | C(11B)-C(16B)-C(15B) | 119.6(3) | C(11C)-C(16C)-C(15C) | 119.0(3) | C(11D)-C(16D)-C(15D) | 118.9(3) |

**Table S6.** Experimental and calculated (on the DFT method level in the solid state) bond lengths (Å) and angles (°) TrMP·BRA (**4**) complex.

|                          | Experimental | Calculated |
|--------------------------|--------------|------------|
| <b>TrMPH<sup>+</sup></b> |              |            |
| N(1)–C(2)                | 1.345(3)     | 1.352      |
| N(1)–C(6)                | 1.345(3)     | 1.347      |
| N(2)–C(3)                | 1.337(3)     | 1.343      |
| N(2)–C(5)                | 1.348(3)     | 1.349      |
| C(5)–C(6)                | 1.378(3)     | 1.388      |
| C(2)–C(3)                | 1.411(3)     | 1.412      |
| C(2)–C(21)               | 1.494(3)     | 1.486      |
| C(3)–C(31)               | 1.498(3)     | 1.490      |
| C(5)–C(51)               | 1.499(3)     | 1.487      |
| N1–C2–C3                 | 117.1(2)     | 116.91     |
| N1–C2–C21                | 119.3(2)     | 119.46     |
| C2–N1–C6                 | 122.1(2)     | 122.77     |
| C3–N2–C5                 | 119.2(2)     | 120.14     |
| N2–C5–C6                 | 120.8(2)     | 120.22     |
| N2–C5–C51                | 117.7(2)     | 118.51     |
| N2–C3–C2                 | 121.6(2)     | 121.07     |
| N2–C3–C31                | 117.9(2)     | 117.90     |
| N1–C6–C5                 | 119.2(2)     | 118.85     |
| C6–C5–C51                | 121.5(2)     | 121.26     |
| C3–C2–C21                | 123.6(2)     | 123.95     |
| C2–C3–C31                | 120.5(2)     | 121.01     |
| <b>BRA<sup>-</sup></b>   |              |            |
| Br(1)–C(11)              | 1.876(2)     | 1.893      |
| Br(2)–Cl(14)             | 1.888(2)     | 1.899      |
| C(13)–O(3)               | 1.243(3)     | 1.261      |
| C(12)–O(2)               | 1.330(3)     | 1.329      |
| C(15)–O(5)               | 1.251(3)     | 1.265      |
| C(16)–O(6)               | 1.222(3)     | 1.237      |
| C(14)–C(15)              | 1.391(3)     | 1.398      |
| C(14)–C(13)              | 1.413(3)     | 1.409      |
| C(15)–C(16)              | 1.551(3)     | 1.551      |
| C(16)–C(11)              | 1.454(3)     | 1.441      |
| C(12)–C(11)              | 1.348(3)     | 1.363      |
| C(12)–C(13)              | 1.517(3)     | 1.509      |
| O2–C12–C11               | 122.3(2)     | 122.25     |
| O2–C12–C13               | 115.48(19)   | 115.99     |
| O3–C13–C14               | 126.1(2)     | 124.94     |
| O3–C13–C12               | 115.8(2)     | 114.48     |
| O5–C15–C14               | 126.3(2)     | 125.36     |
| O5–C15–C16               | 116.1(2)     | 116.75     |
| O6–C16–C15               | 117.66(19)   | 117.83     |
| O6–C16–C11               | 123.2(2)     | 123.38     |
| C11–C16–C15              | 118.95(19)   | 118.77     |
| C11–C12–C13              | 122.2(2)     | 121.70     |
| C12–C11–Br1              | 121.64(17)   | 121.45     |
| C12–C11–C16              | 119.9(2)     | 120.38     |



**Table S6.** Experimental and calculated (on the DFT method level in the solid state) bond lengths and angles TrMP·BRA (4) complex. (Å, °) (continued).

|             |            |        |
|-------------|------------|--------|
| C13–C14–Br2 | 117.25(17) | 117.32 |
| C14–C15–C16 | 117.66(19) | 117.88 |
| C14–C13–C12 | 118.1(2)   | 118.51 |
| C15–C14–Br2 | 119.89(16) | 120.09 |
| C15–C14–C13 | 122.8(2)   | 122.55 |
| C16–C11–Br1 | 118.43(17) | 118.12 |

**Table S7.** Hydrogen bonds and short contacts for crystals (1) and (2).

| 2MP·CLA (1)                                                                    |         |           |           |             |
|--------------------------------------------------------------------------------|---------|-----------|-----------|-------------|
| D–H···A (Å)                                                                    | D–H (Å) | H···A (Å) | D···A (Å) | D–H···A (°) |
| O(2)–H(1)···N(1)                                                               | 0.85(3) | 1.85(3)   | 2.664(2)  | 159(3)      |
| O(5)–H(2)···N(2) <sup>2</sup>                                                  | 0.84(3) | 1.91(3)   | 2.700(2)  | 155(3)      |
| C(3)–H(3)···O(6) <sup>1</sup>                                                  | 0.95    | 2.43      | 3.065(3)  | 124         |
| C(6)–H(6)···O(3)                                                               | 0.95    | 2.40      | 3.055(3)  | 125         |
| C(21)–H(21)···O(2)                                                             | 0.98    | 2.56      | 3.276(3)  | 130         |
| C(21)–H(23)···O(5) <sup>3</sup>                                                | 0.98    | 2.64      | 3.414(3)  | 136         |
| Symmetry codes: (1) $x-1, y, z-1$ ; (2) $x+1, y, z+1$ ; (3) $-x+2, -y, -z+1$ . |         |           |           |             |
| 2MP·BRA (2)                                                                    |         |           |           |             |
| D–H···A (Å)                                                                    | D–H (Å) | H···A (Å) | D···A (Å) | D–H···A (°) |
| O(2)–H(1)···N(1)                                                               | 0.84    | 1.89      | 2.645(4)  | 149         |
| C(3)–H(3)···O(3)                                                               | 0.95    | 2.50      | 2.124(5)  | 123         |
| C(21)–H(21C)···O(2) <sup>3</sup>                                               | 0.98    | 2.62      | 3.530(9)  | 155         |
| Symmetry codes: (3) $-x, y, -z+1/2$ .                                          |         |           |           |             |

**Table S8.** Hydrogen bonds and short contacts for crystals (3a) at 200 K.

| TrMP·CLA (3a) at 200 K                                                                               |         |           |           |         |
|------------------------------------------------------------------------------------------------------|---------|-----------|-----------|---------|
| D–H···A (Å)                                                                                          | D–H (Å) | H···A (Å) | D···A (Å) | D–H···A |
| O(2)–H(2)···O(3) <sup>1</sup>                                                                        | 0.84    | 1.90      | 2.658(2)  | 150     |
| N(1)–H(1)···O(5)                                                                                     | 0.96    | 1.74(3)   | 2.681(2)  | 164(2)  |
| C(6)–H(6)···O(6)                                                                                     | 0.95    | 2.32      | 2.978(2)  | 126     |
| C(21)–H(21)···O(5)                                                                                   | 0.98    | 2.38      | 3.215(2)  | 143     |
| C(31)–H(32)···Cl(2) <sup>2</sup>                                                                     | 0.98    | 2.93      | 3.560(2)  | 123     |
| C(31)–H(33)···N(2) <sup>4</sup>                                                                      | 0.98    | 2.82      | 3.793(3)  | 1756    |
| C(51)–H(53)···O(2) <sup>3</sup>                                                                      | 0.98    | 2.79      | 3.550(3)  | 135     |
| symmetry codes: (1) $-x+1, -y+1, -z$ ; (2) $-x, -y, -z+1$ ; (3) $x, y, z+1$ ; (4) $-x, -y+1, -z+2$ . |         |           |           |         |

**Table S9.** Hydrogen bonds and short contacts for crystals (**3b**) at 100 K.

| <b>TrMP·CLA (3b) at 100K</b>                                                                                                                                    |            |                  |                  |                |
|-----------------------------------------------------------------------------------------------------------------------------------------------------------------|------------|------------------|------------------|----------------|
| <b>D–H···A (Å)</b>                                                                                                                                              | <b>D–H</b> | <b>H···A (Å)</b> | <b>D···A (Å)</b> | <b>D–H···A</b> |
| <b>ionic pair A</b>                                                                                                                                             |            |                  |                  |                |
| N(1A)–H(1A)···O(5A)                                                                                                                                             | 0.88       | 1.84             | 2.702(4)         | 165            |
| O(2A)–H(2A)···O(3B) <sup>1</sup>                                                                                                                                | 0.84       | 1.92             | 2.668(3)         | 148            |
| C(6A)–H(6A)···O(6A)                                                                                                                                             | 0.95       | 2.32             | 2.965(4)         | 125            |
| C(21A)–H(21A)···O(5A)                                                                                                                                           | 0.98       | 2.37             | 3.215(5)         | 144            |
| C(21A)–H(23A)···O(2D) <sup>2</sup>                                                                                                                              | 0.98       | 2.67             | 3.312(4)         | 123            |
| C(21A)–H(32A)···O(3D) <sup>3</sup>                                                                                                                              | 0.98       | 2.70             | 3.268(4)         | 117            |
| <b>ionic pair B</b>                                                                                                                                             |            |                  |                  |                |
| N(1B)–H(1B)···O(5B)                                                                                                                                             | 0.88       | 1.80             | 2.658(4)         | 165            |
| O(2B)–H(2B)···O(3A) <sup>1</sup>                                                                                                                                | 0.84       | 1.92             | 2.668(3)         | 148            |
| C(6B)–H(6B)···O(6B)                                                                                                                                             | 0.95       | 2.29             | 2.945(4)         | 125            |
| C(21B)–H(21B)···O(5B)                                                                                                                                           | 0.98       | 2.36             | 3.191(5)         | 142            |
| C(21B)–H(22B)···Cl(1D) <sup>4</sup>                                                                                                                             | 0.98       | 2.91             | 3.779(3)         | 149            |
| C(31B)–H(32B)···Cl(2C) <sup>4</sup>                                                                                                                             | 0.98       | 2.89             | 3.714(4)         | 143            |
| C(51B)–H(53B)···Cl(1C) <sup>4</sup>                                                                                                                             | 0.98       | 2.88             | 3.843(4)         | 168            |
| C(51B)–H(51B)···Cl(2D) <sup>2</sup>                                                                                                                             | 0.98       | 2.88             | 3.812(4)         | 159            |
| <b>ionic pair C</b>                                                                                                                                             |            |                  |                  |                |
| N(1C)–H(1C)···O(5C)                                                                                                                                             | 0.88       | 1.81             | 2.668(4)         | 165            |
| O(2C)–H(2C)···O(3C) <sup>5</sup>                                                                                                                                | 0.84       | 1.97             | 2.715(3)         | 147            |
| C(6C)–H(6C)···O(6C)                                                                                                                                             | 0.95       | 2.31             | 2.955(5)         | 125            |
| C(21C)–H(21C)···O(5C)                                                                                                                                           | 0.98       | 2.36             | 3.190(5)         | 142            |
| C(31C)–H(32C)···Cl(2A) <sup>4</sup>                                                                                                                             | 0.98       | 2.92             | 3.796(3)         | 150            |
| <b>ionic pair D</b>                                                                                                                                             |            |                  |                  |                |
| N(1D)–H(1D)···O(5D)                                                                                                                                             | 0.88       | 1.85             | 2.708(4)         | 165            |
| O(2D)–H(2D)···O(3D) <sup>7</sup>                                                                                                                                | 0.84       | 1.87             | 2.628(3)         | 149            |
| C(6D)–H(6D)···O(6D)                                                                                                                                             | 0.95       | 2.33             | 2.972(5)         | 125            |
| C(21D)–H(21D)···O(5D)                                                                                                                                           | 0.98       | 2.36             | 3.202(5)         | 144            |
| C(21D)–H(23D)···O(2A) <sup>2</sup>                                                                                                                              | 0.98       | 2.72             | 3.349(4)         | 123            |
| C(21D)–H(22D)···O(6B) <sup>2</sup>                                                                                                                              | 0.98       | 2.70             | 3.305(4)         | 121            |
| C(31D)–H(33D)···Cl(1B) <sup>2</sup>                                                                                                                             | 0.98       | 2.91             | 3.800(3)         | 151            |
| Symmetry codes: (1) $-x, -y, -z+1$ ; (2) $-x+1, -y+1, -z+1$ ; (3) $x+1, y, z+1$ ; (4) $x, y, z+1$ ; (5) $-x+1, -y, -z$ ; (6) $x+1, y, z$ ; (7) $-x, -y+1, -z$ . |            |                  |                  |                |

**Table S10.** Hydrogen bonds and short contacts for crystals **(4)**.

| <b>TrMP·BRA (4)</b>                                                                                    |                |                  |                  |                    |
|--------------------------------------------------------------------------------------------------------|----------------|------------------|------------------|--------------------|
| <b>D–H···A (Å)</b>                                                                                     | <b>D–H (Å)</b> | <b>H···A (Å)</b> | <b>D···A (Å)</b> | <b>D–H···A (°)</b> |
| N1–H1···O5                                                                                             | 0.92 (3)       | 1.79 (4)         | 2.682(3)         | 162 (3)            |
| O2–H2···O3 <sup>1</sup>                                                                                | 0.84           | 1.93             | 2.666(2)         | 146                |
| C6–H6···O6                                                                                             | 0.95           | 2.30             | 2.947(3)         | 125                |
| C21–H21···O5                                                                                           | 0.98           | 2.38             | 3.215(3)         | 143                |
| C21–H22···O2 <sup>2</sup>                                                                              | 0.98           | 2.74             | 3.356(3)         | 121                |
| C21–H23···O6 <sup>3</sup>                                                                              | 0.98           | 2.90             | 3.436(3)         | 115                |
| C51–H52···O2 <sup>4</sup>                                                                              | 0.98           | 2.80             | 3.526(3)         | 132                |
| Symmetry codes: (1) $-x, -y+1, -z$ ; (2) $-x, -y+1, -z+1$ ; (3) $-x+1, -y+1, -z+1$ ; (4) $x, y, z+1$ . |                |                  |                  |                    |

**Table S11.** Calculated and experimental frequencies for the 2MP·CLA (**1**) complex.

| IR FREQUENCIES [cm <sup>-1</sup> ] | RAMAN FREQUENCIES [cm <sup>-1</sup> ] | HARM. FREQUENCIES [cm <sup>-1</sup> ] | IR | RAMAN | ASSIGNMENTS                                                                                                                           |
|------------------------------------|---------------------------------------|---------------------------------------|----|-------|---------------------------------------------------------------------------------------------------------------------------------------|
| 77 (vw)                            |                                       | 75                                    | A  | I     |                                                                                                                                       |
| 90 (vw)                            |                                       | 89                                    | A  | I     |                                                                                                                                       |
| 95 (w)                             |                                       | 92                                    | A  | I     | 2MP: $\rho_{(r)}\text{CH}_3$                                                                                                          |
|                                    |                                       | 96                                    | A  | I     |                                                                                                                                       |
| 98 (w)                             |                                       | 98                                    | A  | I     |                                                                                                                                       |
| 100 (w)                            |                                       | 102                                   | A  | I     | 2MP: $\rho_{(r)}\text{CH}_3$                                                                                                          |
| 112 (s)                            |                                       | 107                                   | A  | I     | 2MP: $\rho_{(r)}\text{CH}_3$ , $\delta_{(\pi)}\text{C-H}$                                                                             |
| 118 (s)                            |                                       | 121                                   | A  | I     | 2MP: $\rho_{(r)}\text{CH}_3$ , $\delta_{\text{torsion ring}}$                                                                         |
| 131 (m)                            |                                       | 129                                   | A  | I     | 2MP: $r(r)\text{CH}_3$ , CLA: $d(p)\text{C=O}$ , $r(r)$ ring                                                                          |
| 138 (m)                            |                                       | 146                                   | A  | I     | 2MP: $r(r)\text{CH}_3$ , CLA: $d(p)\text{C-OH}$                                                                                       |
| 141 (w)                            |                                       | 148                                   | A  | I     | 2MP: $\rho_{(r)}\text{CH}_3$ , $\delta_{(\pi)}\text{C-H}$ , ring butter. (2MP+CLA)                                                    |
| 156 (w)                            |                                       | 161                                   | A  | I     | CLA: $d\text{C-Cl}$ , ring torsion (2MP+CLA)                                                                                          |
|                                    | 208 (vw)                              | 207                                   | I  | A     | ring butter. (2MP+CLA)                                                                                                                |
| 204 (s)                            |                                       | 211                                   | A  | I     | ring butter. (2MP+CLA)                                                                                                                |
| 213 (w)                            |                                       | 213                                   | A  | I     | ring butter. (2MP+CLA)                                                                                                                |
|                                    | 218 (vw)                              | 218                                   | I  | A     | ring butter. (2MP+CLA)                                                                                                                |
| 216 (w)                            |                                       | 219                                   | A  | I     | ring butter. (2MP+CLA)                                                                                                                |
|                                    | 221 (vw)                              | 220                                   | I  | A     | 2MP: $\rho_{(w)}\text{CH}_3$ , $\delta_{(\pi)}\text{C-H}$ , ring butter.                                                              |
| 226 (vw)                           |                                       | 224                                   | A  | I     | 2MP: $\rho_{(w)}\text{CH}_3$ , $\delta_{(\pi)}\text{C-H}$ , $\delta_{(\pi)}\text{C-CH}_3$                                             |
| 235 (vw)                           |                                       | 224                                   | A  | I     | 2MP: $\rho_{(w)}\text{CH}_3$ , $\delta_{(\pi)}\text{C-H}$ , $\delta_{(\pi)}\text{C-CH}_3$                                             |
| 243 (vw)                           |                                       | 250                                   | A  | I     | CLA: $\rho_{(r)}$ ring                                                                                                                |
| 251 (vw)                           |                                       | 251                                   | A  | I     | CLA: $\rho_{(r)}$ ring                                                                                                                |
|                                    | 246 (w)                               | 252                                   | I  | A     | CLA: $\rho_{(r)}$ ring                                                                                                                |
|                                    | 266 (vw)                              | 253                                   | I  | A     | CLA: $\rho_{(r)}$ ring                                                                                                                |
| 322 (vw)                           |                                       | 293                                   | A  | I     | CLA: $\nu_{(\text{ass})}\text{CCC}$ , $\delta\text{C-OH}$ , $\nu\text{C-Cl}$ , $\nu\text{C=O}$                                        |
| 341 (vw)                           |                                       | 347                                   | A  | I     | 2MP: $\rho_{(r)}\text{CH}_3$ , $\delta\text{C-CH}_3$ , $\nu_{(\text{ass})}\text{CNC}$ , CLA: $\delta\text{C-OH}$ , $\delta\text{C=O}$ |
| 352 (m)                            |                                       | 352                                   | A  | I     | 2MP: $\rho_{(r)}\text{CH}_3$ , $\delta\text{C-CH}_3$ , $\nu_{(\text{ass})}\text{CNC}$ , CLA: $\delta\text{C-OH}$ , $\delta\text{C=O}$ |

**Table S11.** Calculated and experimental frequencies for the 2MP·CLA (**1**) complex (continued).

|          |          |     |   |   |                                                                                                                                            |
|----------|----------|-----|---|---|--------------------------------------------------------------------------------------------------------------------------------------------|
| 359 (s)  |          | 355 | A | I | 2MP: $\rho_{(t)}\text{CH}_3$ , $\delta\text{C-CH}_3$ , $\nu_{(\text{ass})}\text{CNC}$ , CLA: $\delta\text{C-OH}$ , $\delta\text{C=O}$      |
| 371 (m)  |          | 378 | A | I | CLA: $\delta_{(\pi)}\text{CCC}$ , $\nu\text{C-Cl}$ , $\delta\text{C-OH}$ , $\delta\text{C=O}$                                              |
|          | 385 (vw) | 383 | I | A | CLA: $\delta_{(\pi)}\text{CCC}$ , $\nu\text{C-Cl}$ , $\delta\text{C-OH}$ , $\delta\text{C=O}$                                              |
| 386 (vw) |          | 384 | A | I | CLA: $\delta_{(\pi)}\text{CCC}$ , $\nu\text{C-Cl}$ , $\delta\text{C-OH}$ , $\delta\text{C=O}$                                              |
| 398 (vw) |          | 405 | A | I | 2MP: $\delta_{(\pi)}\text{C-H}$ , $\delta_{(t,\pi)}\text{CNC}$                                                                             |
|          | 395 (w)  | 405 | I | A | 2MP: $\delta_{(\pi)}\text{C-H}$ , $\delta_{(t,\pi)}\text{CNC}$                                                                             |
| 411 (m)  |          | 406 | A | I | 2MP: $\delta\text{CNC}$ , CLA: $\nu_{(\text{ass})}\text{CCC}$ , $\delta\text{C-OH}$ , $\delta\text{C=O}$ , $\delta\text{C-Cl}$             |
| 412 (m)  |          | 407 | A | I | 2MP: $\rho_{(w)}\text{CH}_3$ , $\delta_{(\pi)}\text{C-H}$ , CLA: $\delta\text{C-OH}$ , $\delta\text{C=O}$                                  |
|          | 412 (w)  | 407 | I | A | CLA: $\nu_{(\text{ass})}\text{CCC}$ , $\delta\text{C-OH}$ , $\delta\text{C=O}$                                                             |
| 421 (vw) |          | 421 | A | I | 2MP: $\nu_{(\text{ass})}\text{CNC}$ , $\nu\text{C-H}$ , CLA: $\nu_{(\text{ass})}\text{CCC}$ , $\delta\text{C=O}$                           |
| 430 (vw) |          | 471 | A | I | 2MP: $\rho_{(w)}\text{CH}_3$ , $\delta\text{C-CH}_3$ , CLA: $\nu\text{C-Cl}$ , ring butter.                                                |
|          | 477 (vw) | 471 | I | A | 2MP: $\rho_{(w)}\text{CH}_3$ , $\delta\text{C-CH}_3$ , CLA: $\nu\text{C-Cl}$ , ring butter.                                                |
| 476 (vw) |          | 472 | A | I | 2MP: $\rho_{(w)}\text{CH}_3$ , $\delta\text{C-CH}_3$ , CLA: $\nu\text{C-Cl}$ , ring butter.                                                |
| 483 (vw) |          | 488 | A | I | CLA: $\rho_{(t)}\text{CCC}$ , $\nu\text{C-OH}$                                                                                             |
|          | 490 (vw) | 492 | I | A | CLA: $\rho_{(t)}\text{CCC}$ , $\delta_{(\pi)}\text{C-OH}$ , $\delta_{(\pi)}\text{C=O}$ , $\delta_{(\pi)}\text{C-Cl}$                       |
| 492 (vw) |          | 503 | A | I | 2MP: $\nu\text{CNC}$ , $\nu_{(\text{ass})}\text{CH}_3$ , $\delta\text{C-H}$ , CLA: $\delta\text{C-Cl}$                                     |
| 522 (vw) |          | 508 | A | I | 2MP: $\rho_{(\text{sc})}\text{CNC}$ , $\nu\text{C-H}$ , CLA: $\delta\text{C-OH}$ , $\nu_{(\text{ass})}\text{CCC}$ ,                        |
|          | 526 (vs) | 528 | I | A | CLA: $\nu\text{CCC}$ , $\nu\text{C-Cl}$ , $\nu\text{C-OH}$ , $\nu\text{C=O}$                                                               |
| 535 (vw) |          | 529 | A | I | CLA: $\nu\text{CCC}$ , $\nu\text{C-Cl}$ , $\nu\text{C-OH}$ , $\nu\text{C=O}$                                                               |
| 553 (m)  |          | 547 | A | I | CLA: $\nu\text{CCC}$ , $\nu\text{C-Cl}$ , $\nu\text{C-OH}$ , $\nu\text{C=O}$                                                               |
| 558 (s)  |          | 548 | A | I | CLA: $\rho_{(t)}\text{CCC}$ , $\delta_{(\pi)}\text{C-OH}$ , $\delta_{(\pi)}\text{C=O}$                                                     |
|          | 568 (vw) | 555 | I | A | CLA: $\rho_{(t)}\text{CCC}$ , $\delta_{(\pi)}\text{C-OH}$ , $\delta_{(\pi)}\text{C=O}$                                                     |
| 563 (vw) |          | 573 | A | I | 2MP: $\nu\text{C-H}$ , $\nu\text{C-CH}_3$ , $\nu\text{CNC}$ , CLA: $\nu\text{C-OH}$ , $\nu\text{C=O}$ , $\nu\text{CCC}$ , $\nu\text{C-Cl}$ |
| 574 (vw) |          | 573 | A | I | 2MP: $\nu\text{C-H}$ , $\nu\text{C-CH}_3$ , $\nu\text{CNC}$ , CLA: $\nu\text{C-OH}$ , $\nu\text{C=O}$ , $\nu\text{CCC}$ , $\nu\text{C-Cl}$ |
|          | 575 (vw) | 574 | I | A | 2MP: $\nu\text{C-H}$ , $\nu\text{C-CH}_3$ , $\nu\text{CNC}$ , CLA: $\nu\text{C-OH}$ , $\nu\text{C=O}$ , $\nu\text{CCC}$ , $\nu\text{C-Cl}$ |
| 617 (vw) |          | 604 | A | I | 2MP: $\rho_{(\text{sc})}\text{CNC}$ , $\nu\text{C-CH}_3$ , $\nu\text{C-H}$ , CLA: $\nu\text{C-OH}$                                         |
|          | 661 (vw) | 604 | I | A | 2MP: $\rho_{(\text{sc})}\text{CNC}$ , $\nu\text{C-CH}_3$ , $\nu\text{C-H}$ , CLA: $\nu\text{C-OH}$                                         |
| 631 (vw) |          | 604 | A | I | 2MP: $\rho_{(\text{sc})}\text{CNC}$ , $\nu\text{C-CH}_3$ , $\nu\text{C-H}$ , CLA: $\nu\text{C-OH}$                                         |
| 697 (vw) |          | 732 | A | I | CLA: $\rho_{(t)}\text{CCC}$                                                                                                                |
| 719 (vw) |          | 732 | A | I | 2MP: $\rho_{(w)}\text{CH}_3$ , $\delta_{(\pi)}\text{C-H}$ , $\rho_{(t)}\text{CNC}$ , CLA: $\rho_{(t)}\text{CCC}$                           |

**Table S11.** Calculated and experimental frequencies for the 2MP·CLA (**1**) complex (continued).

|          |          |      |   |   |                                                                                                                  |
|----------|----------|------|---|---|------------------------------------------------------------------------------------------------------------------|
| 728 (vw) |          | 733  | A | I | 2MP: $\rho_{(w)}\text{CH}_3$ , $\delta_{(\pi)}\text{C-H}$ , $\rho_{(t)}\text{CNC}$ , CLA: $\rho_{(t)}\text{CCC}$ |
|          | 744 (vw) | 736  | I | A | CLA: $\rho_{(t)}\text{CCC}$                                                                                      |
| 743 (vw) |          | 736  | A | I | 2MP: $\delta_{(\pi)}\text{CH}$ , CLA: $\delta_{(\pi)}\text{C=O}$ , $\rho_{(t)}\text{CCC}$                        |
| 768 (vw) |          | 759  | A | I | 2MP: $\rho_{(\text{sc})}\text{CNC}$ , CLA: $\delta\text{C-OH}$ , $\delta\text{C=O}$ , $\rho_{(t)}\text{ring}$    |
|          | 785 (vw) | 800  | I | A | CLA: $\rho_{(\text{sc})}\text{CCC}$ , $\delta\text{C-OH}$ , $\delta\text{C=O}$ , $\nu\text{C-Cl}$                |
| 786 (vw) |          | 804  | A | I | CLA: $\rho_{(\text{sc})}\text{CCC}$ , $\delta\text{C-OH}$ , $\delta\text{C=O}$ , $\nu\text{C-Cl}$                |
| 799 (w)  |          | 808  | A | I | 2MP: $\rho_{(w)}\text{CH}_3$ , $\delta_{(\pi)}\text{C-H}$                                                        |
| 811 (w)  |          | 812  | A | I | 2MP: $\rho_{(w)}\text{CH}_3$ , $\delta_{(\pi)}\text{C-H}$                                                        |
|          | 818 (vw) | 819  | I | A | 2MP: $\nu\text{C-CH}_3$ , $\delta_{(\pi)}\text{C-H}$ , $\rho_{(\text{sc})}\text{CNC}$                            |
| 832 (m)  |          | 820  | A | I | 2MP: $\nu\text{C-CH}_3$ , $\delta_{(\pi)}\text{C-H}$ , $\nu\text{CNC}$                                           |
| 832 (m)  |          | 820  | A | I | 2MP: $\nu\text{C-CH}_3$ , $\delta_{(\pi)}\text{C-H}$ , $\nu\text{CNC}$                                           |
|          | 833 (w)  | 821  | I | A | 2MP: $\nu\text{C-CH}_3$ , $\delta_{(\pi)}\text{C-H}$ , $\nu\text{CNC}$                                           |
| 848 (m)  |          | 852  | A | I | CLA: $\nu\text{C-Cl}$ , $\delta\text{OH}$ , $\nu\text{C-Cl}$                                                     |
| 885 (w)  |          | 886  | A | I | 2MP: $\rho_{(t)}\text{CH}_3$ , $\delta\text{C-H}$ , $\rho_{(\text{sc})}\text{CNC}$ , CLA: $\nu\text{C-Cl}$       |
| 904 (w)  |          | 915  | A | I | 2MP: $\rho_{(w)}\text{CH}_3$ , $\delta\text{C-H}$ , CLA: $\delta\text{O-H}$                                      |
|          | 910 (vw) | 915  | I | A | 2MP: $\rho_{(w)}\text{CH}_3$ , $\delta\text{C-H}$ , CLA: $\delta\text{O-H}$                                      |
| 933 (w)  |          | 943  | A | I | 2MP: $\rho_{(w)}\text{CH}_3$ , $\delta\text{C-H}$ , $\rho_{(w)}\text{CNC}$                                       |
| 945 (w)  |          | 945  | A | I | 2MP: $\rho_{(w)}\text{CH}_3$ , $\delta\text{C-H}$ , $\rho_{(w)}\text{CNC}$                                       |
| 957 (w)  |          | 962  | A | I | CLA: $\nu\text{C-Cl}$ , $\nu_{(\text{ass})}\text{CCC}$ , $\delta\text{OH}$                                       |
| 975 (w)  |          | 964  | A | I | CLA: $\nu\text{C-Cl}$ , $\nu_{(\text{ass})}\text{CCC}$ , $\delta\text{OH}$                                       |
|          | 975 (vw) | 965  | I | A | CLA: $\nu\text{C-Cl}$ , $\nu_{(\text{ass})}\text{CCC}$ , $\delta\text{OH}$                                       |
| 985 (m)  |          | 993  | A | I | 2MP: $\rho_{(t)}\text{CH}_3$ , CLA: $\delta_{(\text{p})}\text{OH}$                                               |
| 991 (s)  |          | 994  | A | I | 2MP: $\rho_{(t)}\text{CH}_3$ , CLA: $\delta_{(\text{p})}\text{OH}$                                               |
|          | 989 (vw) | 995  | I | A | 2MP: $\rho_{(t)}\text{CH}_3$ , CLA: $\delta_{(\text{p})}\text{OH}$                                               |
| 1029 (m) |          | 1025 | A | I | 2MP: $\rho_{(w)}\text{CH}_3$ , $\delta_{(\pi)}\text{C-H}$ , CLA: $\delta_{(\pi)}\text{OH}$                       |
| 1035 (m) |          | 1026 | A | I | 2MP: $\rho_{(w)}\text{CH}_3$ , $\rho_{(t)}\text{CCC}$ , CLA: $\delta_{(\pi)}\text{OH}$                           |
|          | 1036 (w) | 1027 | I | A | 2MP: $\rho_{(w)}\text{CH}_3$ , $\rho_{(t)}\text{CCC}$ , CLA: $\delta_{(\pi)}\text{OH}$                           |
| 1054 (m) |          | 1053 | A | I | 2MP: $\delta\text{C-H}$ , $\nu\text{C-CH}_3$ , $\nu\text{CNC}$ , $\rho_{(w)}\text{CH}_3$                         |
| 1067 (m) |          | 1054 | A | I | 2MP: $\delta\text{C-H}$ , $\nu\text{C-CH}_3$ , $\nu\text{CNC}$ , $\rho_{(w)}\text{CH}_3$                         |
|          | 1066 (w) | 1054 | I | A | 2MP: $\delta\text{C-H}$ , $\nu\text{C-CH}_3$ , $\nu\text{CNC}$ , $\rho_{(w)}\text{CH}_3$                         |

**Table S11.** Calculated and experimental frequencies for the 2MP·CLA (**1**) complex (continued).

|           |           |      |   |   |                                                                                                                                      |
|-----------|-----------|------|---|---|--------------------------------------------------------------------------------------------------------------------------------------|
| 1130 (m)  |           | 1144 | A | I | CLA: $\nu_{(\text{ass})}\text{CCC}$ , $\delta\text{OH}$                                                                              |
| 1144 (m)  |           | 1145 | A | I | CLA: $\nu_{(\text{ass})}\text{CCC}$ , $\delta\text{OH}$                                                                              |
| 1163 (m)  |           | 1154 | A | I | 2MP: $\rho_{(\text{t})}\text{CH}_3$ , $\delta\text{C-H}$ , $\nu_{(\text{ass})}\text{CNC}$ , CLA: $\delta\text{OH}$                   |
| 1172 (m)  |           | 1156 | A | I | 2MP: $\rho_{(\text{t})}\text{CH}_3$ , $\delta\text{C-H}$ , $\nu_{(\text{ass})}\text{CNC}$ , CLA: $\delta\text{OH}$                   |
| 1187 (m)  |           | 1180 | A | I | 2MP: $\delta\text{C-H}$ , $\nu\text{C-CH}_3$ , CLA: $\nu\text{C-Cl}$ , $\delta\text{OH}$                                             |
| 1196 (m)  |           | 1184 | A | I | 2MP: $\delta\text{C-H}$ , $\nu\text{C-CH}_3$ , CLA: $\nu\text{C-Cl}$ , $\delta\text{OH}$                                             |
| 1211 (m)  |           | 1220 | A | I | 2MP: $\nu\text{C-CH}_3$ , $\nu_{(\text{ass})}\text{CNC}$ , CLA: $\delta_{(\pi)}\text{C-H}$                                           |
| 1220 (m)  |           | 1221 | A | I | 2MP: $\nu\text{C-CH}_3$ , $\nu_{(\text{ass})}\text{CNC}$ , CLA: $\delta_{(\pi)}\text{C-H}$                                           |
| 1235 (vs) |           | 1235 | A | I | 2MP: $\delta\text{C-H}$ , $\rho_{(\text{w})}\text{CH}_3$ , $\nu_{(\text{ass})}\text{CNC}$ , CLA: $\nu\text{C-OH}$ , $\nu\text{C-Cl}$ |
| 1236 (vs) |           | 1238 | A | I | 2MP: $\delta\text{C-H}$ , $\rho_{(\text{w})}\text{CH}_3$ , $\nu_{(\text{ass})}\text{CNC}$ , CLA: $\nu\text{C-OH}$ , $\nu\text{C-Cl}$ |
|           | 1240 (w)  | 1243 | I | A | 2MP: $\delta\text{C-H}$ , $\rho_{(\text{w})}\text{CH}_3$ , $\nu_{(\text{ass})}\text{CNC}$ , CLA: $\nu\text{C-OH}$ , $\nu\text{C-Cl}$ |
|           | 1243 (vw) | 1244 | I | A | 2MP: $\delta\text{C-H}$ , $\rho_{(\text{w})}\text{CH}_3$ , $\nu_{(\text{ass})}\text{CNC}$ , CLA: $\nu\text{C-OH}$ , $\nu\text{C-Cl}$ |
| 1253 (m)  |           | 1249 | A | I | CLA: $\nu_{(\text{ass})}\text{CCC}$ , $\nu\text{C-OH}$ , $\nu\text{C=O}$                                                             |
| 1261 (m)  |           | 1256 | A | I | 2MP: $\delta\text{C-H}$ , $\delta\text{C-CH}_3$ , $\nu_{(\text{ass})}\text{CNC}$                                                     |
| 1261 (m)  |           | 1257 | A | I | 2MP: $\delta\text{C-H}$ , $\delta\text{C-CH}_3$ , $\nu_{(\text{ass})}\text{CNC}$                                                     |
| 1299 (w)  |           | 1285 | A | I | 2MP: $\delta\text{C-H}$ , CLA: $\delta\text{OH}$                                                                                     |
|           | 1299 (vw) | 1294 | I | A | 2MP: $\delta\text{C-H}$ , CLA: $\delta\text{OH}$                                                                                     |
| 1310 (s)  |           | 1317 | A | I | 2MP: $\delta\text{C-H}$ , CLA: $\rho_{(\text{t})}\text{CCC}$                                                                         |
| 1312 (s)  |           | 1320 | A | I | 2MP: $\delta\text{C-H}$ , CLA: $\rho_{(\text{t})}\text{CCC}$                                                                         |
|           | 1331 (vw) | 1366 | I | A | 2MP: $\delta\text{C-H}$ , CLA: $\rho_{(\text{t})}\text{CCC}$                                                                         |
| 1354 (w)  |           | 1367 | A | I | 2MP: $\delta\text{C-H}$ , $\nu_{(\text{ass})}\text{CCC}$ , $\nu_{(\text{ass})}\text{CNC}$ , CLA: $\nu_{(\text{ass})}\text{CCC}$      |
| 1367 (w)  |           | 1369 | A | I | 2MP: $\delta\text{C-H}$ , $\nu_{(\text{ass})}\text{CCC}$ , $\nu_{(\text{ass})}\text{CNC}$ , CLA: $\nu_{(\text{ass})}\text{CCC}$      |
| 1384 (w)  |           | 1385 | A | I | 2MP: $\rho_{(\text{w})}\text{CH}_3$ , $\delta\text{C-H}$ , $\nu\text{CC}$                                                            |
|           | 1392 (vw) | 1396 | I | A | 2MP: $\delta\text{C-H}$ , $\rho_{(\text{sc.})}\text{CH}_3$ , $\rho_{(\text{t})}\text{CNC}$                                           |
| 1405 (w)  |           | 1401 | A | I | 2MP: $\delta\text{C-H}$ , $\rho_{(\text{sc.})}\text{CH}_3$ , $\nu_{(\text{ass})}\text{CNC}$                                          |
| 1414 (vw) |           | 1415 | A | I | 2MP: $\delta\text{C-H}$ , $\rho_{(\text{sc.})}\text{CH}_3$ , $\nu_{(\text{ass})}\text{CNC}$                                          |
| 1446 (vw) |           | 1443 | A | I | 2MP: $\delta\text{C-H}$ , $\rho_{(\text{sc.})}\text{CH}_3$                                                                           |
| 1464 (vw) |           | 1464 | A | I | 2MP: $\delta\text{C-H}$ , $\rho_{(\text{t})}\text{CH}_3$ , $\nu\text{CNC}$                                                           |
| 1475 (vw) |           | 1491 | A | I | 2MP: $\delta\text{C-H}$ , $\rho_{(\text{t})}\text{CH}_3$ , $\nu_{(\text{ass})}\text{CNC}$                                            |
| 1526 (vw) |           | 1556 | A | I | CLA: $\delta\text{C-OH}$ , $\nu\text{C=O}$                                                                                           |

**Table S11.** Calculated and experimental frequencies for the 2MP·CLA (**1**) complex (continued).

|           |           |      |   |   |                                                                                                                            |
|-----------|-----------|------|---|---|----------------------------------------------------------------------------------------------------------------------------|
| 1548 (vw) |           | 1560 | A | I | CLA: $\delta\text{C-OH}$ , $\nu\text{C=O}$                                                                                 |
|           | 1530 (vw) | 1578 | I | A | 2MP: $\delta\text{C-H}$ , $\rho_{(t)}\text{CCC}$ , CLA: $\rho_{(t)}\text{CCC}$                                             |
| 1574 (w)  |           | 1579 | A | I | 2MP: $\rho_{(t)}\text{CH}_3$ , $\delta\text{C-H}$ , CLA: $\delta\text{C=O}$ , $\delta\text{C-OH}$                          |
|           | 1599 (vs) | 1602 | I | A | 2MP: $\delta\text{C-H}$ , $\rho_{(t)}\text{CH}_3$ , $\rho_{(t)}\text{CCC}$ , CLA: $\delta\text{C-OH}$ , $\delta\text{C=O}$ |
| 1606 (m)  |           | 1602 | A | I | 2MP: $\delta\text{C-H}$ , $\nu_{(\text{ass})}\text{CNC}$ , CLA: $\delta\text{C-OH}$ , $\delta\text{C=O}$                   |
| 1615 (m)  |           | 1607 | A | I | 2MP: $\delta\text{C-H}$ , $\nu_{(\text{ass})}\text{CNC}$ , CLA: $\delta\text{C-OH}$ , $\delta\text{C=O}$                   |
| 1625 (m)  |           | 1626 | A | I | 2MP: $\delta\text{C-H}$ , $\nu_{(\text{ass})}\text{CNC}$ , CLA: $\delta\text{C-OH}$ , $\delta\text{C=O}$                   |
| 1626 (m)  |           | 1626 | A | I | 2MP: $\delta\text{C-H}$ , $\nu_{(\text{ass})}\text{CNC}$ , CLA: $\delta\text{C-OH}$ , $\delta\text{C=O}$                   |
| 1655 (m)  |           | 1632 | A | I | 2MP: $\delta\text{C-H}$ , $\rho_{(t)}\text{CCC}$ , CLA: $\rho_{(t)}\text{CCC}$ , $\delta\text{C=O}$                        |
| 1667 (s)  |           | 1633 | A | I | 2MP: $\delta\text{C-H}$ , $\rho_{(t)}\text{CCC}$ , CLA: $\rho_{(t)}\text{CCC}$                                             |
|           | 1637 (s)  | 1637 | I | A | 2MP: $\delta\text{C-H}$ , $\rho_{(t)}\text{CCC}$ , CLA: $\rho_{(t)}\text{CCC}$                                             |
| 1678 (m)  |           | 1644 | A | I | 2MP: $\delta\text{C-H}$ , $\nu_{(\text{ass})}\text{CNC}$                                                                   |
| 1684 (m)  |           | 1646 | A | I | 2MP: $\delta\text{C-H}$ , $\nu_{(\text{ass})}\text{CNC}$                                                                   |
|           | 1672 (vw) | 1647 | I | A | 2MP: $\delta\text{C-H}$ , $\nu\text{C-C}$                                                                                  |
| 2199 (vw) |           | 2826 | A | I | CLA: $\nu\text{O-H}$                                                                                                       |
| 2399 (w)  |           | 2827 | A | I | CLA: $\nu\text{O-H}$                                                                                                       |
|           | 2331 (vw) | 2827 | I | A | CLA: $\nu\text{O-H}$                                                                                                       |
| 2551 (w)  |           | 2831 | I | A | 2MP: $\nu_{(\text{s})}\text{CH}_3$                                                                                         |
| 2724 (w)  |           | 2955 | A | I | 2MP: $\nu_{(\text{s})}\text{CH}_3$                                                                                         |
|           | 2931 (w)  | 2957 | A | I | 2MP: $\nu_{(\text{s})}\text{CH}_3$                                                                                         |
| 2932 (vw) |           | 3039 | A | I | 2MP: $\nu_{(\text{s})}\text{CH}_3$                                                                                         |
| 3066 (vw) |           | 3041 | A | I | 2MP: $\nu_{(\text{s})}\text{CH}_3$                                                                                         |
|           | 3082 (vw) | 3088 | I | A | 2MP: $\nu_{(\text{ass})}\text{CH}_3$                                                                                       |
| 3283 (vw) |           | 3088 | A | I | 2MP: $\nu_{(\text{ass})}\text{CH}_3$                                                                                       |
| 3455 (vw) |           | 3155 | A | I | 2MP: $\nu\text{C-H}_{(\text{ring})}$                                                                                       |

$\nu$ -stretching,  $\delta$ -deformation (bending), sc.-scissors,  $\rho_w$ -wagging,  $\rho_r$ -rocking,  $\rho_t$ -twisting,  $\pi$ -out of the plane, s-symmetric, ass-asymmetric, vs-very strong, s-strong, m-medium, w-weak, vw-very weak, A-active, I-inactive band



**Table S12.** Calculated and experimental frequencies for the 2MP·BRA (**2**) complex.

| IR FREQUENCIES [cm <sup>-1</sup> ] | RAMAN FREQUENCIES [cm <sup>-1</sup> ] | HARM. FREQUENCIES [cm <sup>-1</sup> ] | IR | RAMAN | ASSIGNMENTS                                                                                               |
|------------------------------------|---------------------------------------|---------------------------------------|----|-------|-----------------------------------------------------------------------------------------------------------|
| 62 (vw)                            |                                       | 61                                    | A  | I     | 2MP: $\rho_{(r)}$ CH <sub>3</sub>                                                                         |
| 81 (vw)                            |                                       | 80                                    | A  | I     | BRA: $\delta_{(\pi)}$ C-OH, ring asym. torsion                                                            |
| 94 (vw)                            |                                       | 93                                    | A  | I     | 2MP: $\rho_{(r)}$ CH <sub>3</sub>                                                                         |
| 115 (w)                            |                                       | 113                                   | A  | I     | 2MP: $\rho_{(r)}$ CH <sub>3</sub>                                                                         |
| 128 (w)                            |                                       | 124                                   | A  | I     | 2MP: $\rho_{(r)}$ CH <sub>3</sub>                                                                         |
| 137 (w)                            |                                       | 138                                   | A  | I     | 2MP: $\rho_{(r)}$ CH <sub>3</sub>                                                                         |
| 144 (w)                            |                                       | 145                                   | A  | I     | 2MP: $\rho_{(r)}$ CH <sub>3</sub>                                                                         |
| 159 (w)                            |                                       | 162                                   | A  | I     | 2MP: $\rho_{(r)}$ CH <sub>3</sub>                                                                         |
| 161 (w)                            |                                       | 170                                   | A  | I     | 2MP: $\rho_{(r)}$ CH <sub>3</sub> , BRA: $\nu$ O-H                                                        |
| 193 (w)                            |                                       | 172                                   | A  | A     | 2MP: $\rho_{(r)}$ CH <sub>3</sub> , BRA: $\nu$ O-H                                                        |
|                                    | 194 (w)                               | 194                                   | I  | A     | BRA: $\delta$ ring, $\nu$ C-Br, 2MP: $\delta_{(\pi)}$ C-H <sub>(ring)</sub>                               |
| 202 (m)                            |                                       | 207                                   | A  | I     | 2MP: $\delta_{(\pi)}$ C-CH <sub>3</sub> , $\delta_{(\pi)}$ C-H, ring butterfly BRA: ring butterfly        |
| 212 (w)                            |                                       | 211                                   | A  | I     | 2MP: $\delta_{(\pi)}$ C-CH <sub>3</sub> , $\delta_{(\pi)}$ C-H, ring butterfly BRA: ring butterfly        |
|                                    | 222 (w)                               | 215                                   | I  | A     | 2MP: $\delta_{(\pi)}$ C-CH <sub>3</sub> , $\delta_{(\pi)}$ C-H, ring butterfly BRA: ring butterfly        |
| 233 (vw)                           |                                       | 235                                   | A  | I     | 2MP: $\delta$ C-CH <sub>3</sub> , BRA: $\rho_{(r)}$ ring                                                  |
| 240 (vw)                           |                                       | 237                                   | A  | I     | 2MP: $\delta$ C-CH <sub>3</sub> , BRA: $\rho_{(r)}$ ring                                                  |
|                                    | 282 (vw)                              | 274                                   | I  | A     | BRA: $\rho_{(t,\pi)}$ ring                                                                                |
| 291 (w)                            |                                       | 274                                   | A  | I     | BRA: $\rho_{(t,\pi)}$ ring                                                                                |
| 294 (w)                            |                                       | 305                                   | A  | I     | 2MP: $\nu_{(s)}$ CH <sub>3</sub> , BRA $\delta$ ring                                                      |
| 302 (m)                            |                                       | 306                                   | A  | I     | 2MP: $\nu_{(s)}$ CH <sub>3</sub> , BRA $\delta$ ring                                                      |
| 348 (vw)                           |                                       | 356                                   | A  | I     | 2MP: $\delta$ C-CH <sub>3</sub> , $\rho_{(w)}$ CH <sub>3</sub> , $\rho_{(r)}$ ring BRA: $\rho_{(r)}$ ring |
| 365 (w)                            |                                       | 357                                   | A  | I     | 2MP: $\delta$ C-CH <sub>3</sub> , $\rho_{(w)}$ CH <sub>3</sub> , $\rho_{(r)}$ ring BRA: $\rho_{(r)}$ ring |
| 380 (w)                            |                                       | 394                                   | A  | I     | 2MP: $\delta$ C-CH <sub>3</sub> , $\delta$ ring BRA: $\delta$ ring                                        |
|                                    | 380 (w)                               | 394                                   | I  | A     | 2MP: $\delta$ C-CH <sub>3</sub> , $\delta$ ring BRA: $\delta$ ring                                        |
| 406 (m)                            |                                       | 408                                   | A  | I     | 2MP: $\delta$ C-CH <sub>3</sub> , $\delta_{(\pi)}$ C-H, BRA: $\delta$ C=O, $\delta$ C-OH                  |
|                                    | 409 (w)                               | 409                                   | I  | A     | 2MP: $\delta$ C-CH <sub>3</sub> , $\delta_{(\pi)}$ C-H, BRA: $\delta$ C=O, $\delta$ C-OH                  |
| 414 (m)                            |                                       | 411                                   | A  | I     | 2MP: $\delta$ C-CH <sub>3</sub> , $\delta_{(\pi)}$ C-H, $\rho_{(t,\pi)}$ ring                             |

**Table S12.** Calculated and experimental frequencies for the 2MP·BRA (2) complex (continued).

|          |          |     |   |   |                                                                                        |
|----------|----------|-----|---|---|----------------------------------------------------------------------------------------|
| 460 (vw) |          | 468 | A | I | 2MP: $\delta\text{C-CH}_3$ , $\delta_{(\pi)}\text{C-H}$ , $\rho_{(\text{t},\pi)}$ ring |
| 465 (vw) |          | 469 | A | I | 2MP: $\delta\text{C-CH}_3$ , $\delta_{(\pi)}\text{C-H}$ , $\rho_{(\text{t},\pi)}$ ring |
|          | 485 (w)  | 486 | I | A | BRA: $\rho_{(\text{t},\text{p})}$ ring                                                 |
| 474 (vw) |          | 486 | A | I | BRA: $\rho_{(\text{t},\text{p})}$ ring                                                 |
| 484 (m)  |          | 494 | A | I | BRA: $\nu\text{O-H}$ , $\nu(\text{C=O+C-OH})$ , $\nu\text{C-Br}$ , $\delta$ ring       |
| 493 (m)  |          | 495 | A | I | BRA: $\nu\text{O-H}$ , $\nu(\text{C=O+C-OH})$ , $\nu\text{C-Br}$ , $\delta$ ring       |
| 511 (m)  |          | 516 | A | I | BRA: $\nu\text{O-H}$ , $\nu(\text{C=O+C-OH})$ , $\nu\text{C-Br}$ , $\delta$ ring       |
|          | 516 (vs) | 516 | I | A | BRA: $\nu\text{O-H}$ , $\nu(\text{C=O+C-OH})$ , $\nu\text{C-Br}$ , $\delta$ ring       |
| 547 (m)  |          | 549 | A | I | BRA: $\rho_{(\text{t})}$ ring                                                          |
| 557 (s)  |          | 550 | A | I | BRA: $\rho_{(\text{t})}$ ring                                                          |
| 568 (m)  |          | 564 | A | I | 2MP: $\nu\text{C-CH}_3$ , $\nu\text{C-H}$ , $\nu\text{CNC}$ , BRA: $\nu\text{O-H}$     |
|          | 570 (vw) | 566 | I | A | 2MP: $\nu\text{C-CH}_3$ , $\nu\text{C-H}$ , $\nu\text{CNC}$ , BRA: $\nu\text{O-H}$     |
| 598 (vw) |          | 566 | A | I | 2MP: $\nu\text{C-CH}_3$ , $\nu\text{C-H}$ , $\nu\text{CNC}$ , BRA: $\nu\text{O-H}$     |
|          | 664 (vw) | 670 | I | A | 2MP: $\delta\text{C-H}$ , $\nu_{(\text{ass})}\text{CNC}$                               |
| 733 (w)  |          | 733 | A | I | BRA: $\delta_{(\text{t},\pi)}\text{ring}$ , $\delta_{(\text{t},\pi)}\text{C=O}$        |
| 739 (w)  |          | 733 | A | I | BRA: $\delta_{(\text{t},\pi)}\text{ring}$ , $\delta_{(\text{t},\pi)}\text{C=O}$        |
|          | 741 (vw) | 744 | I | A | BRA: $\delta_{(\text{t},\pi)}\text{ring}$ , $\delta_{(\text{t},\pi)}\text{C=O}$        |
| 754 (w)  |          | 763 | A | I | BRA: $\delta\text{O-H}$ , $\delta(\text{C=O+C-OH})$ , $\rho_{(\text{t})}\text{ring}$   |
| 781 (m)  |          | 774 | A | I | BRA: $\delta\text{O-H}$ , $\delta(\text{C=O+C-OH})$ , $\rho_{(\text{t})}\text{ring}$   |
|          | 771 (w)  | 779 | I | A | BRA: $\delta\text{O-H}$ , $\delta(\text{C=O+C-OH})$ , $\rho_{(\text{t})}\text{ring}$   |
|          | 785 (w)  | 808 | I | A | 2MP: $\delta_{(\pi)}\text{C-CH}_3$ , $\delta_{(\pi)}\text{C-H}$                        |
| 802 (m)  |          | 811 | A | I | 2MP: $\delta_{(\pi)}\text{C-CH}_3$ , $\delta_{(\pi)}\text{C-H}$                        |
| 804 (m)  |          | 814 | A | I | BRA: $\delta$ ring                                                                     |
|          | 823 (w)  | 814 | I | A | 2MP: $\nu\text{C-CH}_3$ , $\nu\text{C-H}$ , BRA: $\delta$ ring                         |
| 824 (m)  |          | 829 | A | I | 2MP: $\nu\text{C-CH}_3$ , $\nu\text{C-H}$ , BRA: $\delta$ ring                         |
|          | 837 (w)  | 829 | I | A | 2MP: $\nu\text{C-CH}_3$ , $\nu\text{C-H}$ , BRA: $\delta$ ring                         |
| 875 (w)  |          | 829 | A | I | 2MP: $\nu\text{C-CH}_3$ , $\nu\text{C-H}$ , BRA: $\delta$ ring                         |
| 917 (w)  |          | 909 | A | I | 2MP: $\rho_{(\text{w})}\text{CH}_3$ , $\delta_{(\pi)}\text{C-H}$                       |
|          | 934 (vw) | 943 | I | A | 2MP: $\delta_{(\pi)}\text{C-H}$                                                        |
| 961 (m)  |          | 961 | A | I | BRA: $\delta\text{O-H}$ , $\delta$ ring                                                |
|          | 972 (vw) | 963 | I | A | BRA: $\delta\text{O-H}$ , $\delta$ ring                                                |

**Table S12.** Calculated and experimental frequencies for the 2MP·BRA (2) complex (continued).

|           |           |      |   |   |                                                                                                                                            |
|-----------|-----------|------|---|---|--------------------------------------------------------------------------------------------------------------------------------------------|
| 974 (s)   |           | 980  | A | I | 2MP: $\rho_{(w)}\text{CH}_3$                                                                                                               |
| 998 (s)   |           | 982  | A | I | 2MP: $\rho_{(w)}\text{CH}_3$                                                                                                               |
| 1018 (s)  |           | 1030 | A | I | 2MP: $\rho_{(w)}\text{CH}_3$                                                                                                               |
| 1037 (m)  |           | 1030 | A | I | 2MP: $\rho_{(w)}\text{CH}_3$ , $\delta_{(\pi)}\text{C-H}$ , $\delta$ ring                                                                  |
|           | 1036 (w)  | 1036 | I | A | 2MP: $\rho_{(w)}\text{CH}_3$ , $\delta_{(\pi)}\text{C-H}$ , $\delta$ ring                                                                  |
| 1043 (w)  |           | 1038 | A | I | 2MP: $\rho_{(w)}\text{CH}_3$ , $\delta_{(\pi)}\text{C-H}$ , $\delta$ ring                                                                  |
| 1060 (w)  |           | 1059 | A | I | 2MP: $\rho_{(w)}\text{CH}_3$ , $\delta_{(\pi)}\text{C-H}$ , $\delta$ ring                                                                  |
|           | 1067 (w)  | 1060 | I | A | 2MP: $\nu_{(\text{ass})}\text{CNC}$ , $\delta\text{C-H}$ , BRA: $\delta\text{O-H}$                                                         |
| 1088 (s)  |           | 1100 | A | I | 2MP: $\delta_{(\pi)}\text{C-H}$ , BRA: $\delta_{(\pi)}\text{O-H}$                                                                          |
| 1110 (w)  |           | 1101 | A | I | 2MP: $\delta_{(\pi)}\text{C-H}$ , BRA: $\delta_{(\pi)}\text{O-H}$                                                                          |
| 1123 (m)  |           | 1123 | A | I | 2MP: $\delta_{(\pi)}\text{C-H}$ , BRA: $\delta\text{O-H}$                                                                                  |
| 1145 (m)  |           | 1125 | A | I | 2MP: $\delta_{(\pi)}\text{C-H}$ , BRA: $\delta\text{O-H}$                                                                                  |
|           | 1169 (w)  | 1151 | I | A | 2MP: $\delta_{(\pi)}\text{C-H}$ , BRA: $\delta\text{O-H}$                                                                                  |
| 1166 (s)  |           | 1151 | A | I | BRA: $\delta\text{O-H}$                                                                                                                    |
| 1194 (m)  |           | 1191 | A | I | 2MP: $\nu_{(\text{ass})}\text{CNC}$ , BRA: $\delta\text{O-H}$                                                                              |
| 1222 (s)  |           | 1215 | A | I | BRA: $\delta\text{O-H}$ , $\nu\text{C-Br}$                                                                                                 |
|           | 1230 (w)  | 1232 | I | A | 2MP: $\nu_{(\text{ass})}\text{CNC}$ , BRA: $\nu\text{CC}$                                                                                  |
| 1241 (s)  |           | 1237 | A | I | 2MP: $\nu\text{C-CH}_3$ , $\delta\text{C-H}$ , $\nu_{(\text{ass})}\text{CNC}$ , BRA: $\delta\text{O-H}$                                    |
| 1255 (s)  |           | 1237 | A | I | 2MP: $\nu\text{C-CH}_3$ , $\delta\text{C-H}$ , $\nu_{(\text{ass})}\text{CNC}$ , BRA: $\delta\text{O-H}$                                    |
|           | 1247 (vw) | 1247 | I | A | 2MP: $\nu\text{C-CH}_3$ , $\delta\text{C-H}$ , $\nu_{(\text{ass})}\text{CNC}$ , BRA: $\delta\text{O-H}$                                    |
|           | 1267 (vw) | 1267 | I | A | 2MP: $\nu\text{C-H}$ , BRA: $\delta\text{O-H}$                                                                                             |
| 1280 (m)  |           | 1283 | A | I | 2MP: $\delta\text{C-H}$ , BRA: $\nu\text{C-OH}$ , $\nu_{(\text{ass})}\text{CCC}$                                                           |
|           | 1292 (vw) | 1291 | I | A | 2MP: $\delta\text{C-H}$ , $\nu_{(\text{ass})}\text{CNC}$ , BRA: $\delta\text{O-H}$                                                         |
| 1302 (w)  |           | 1295 | A | I | 2MP: $\delta\text{C-H}$ , $\nu_{(\text{ass})}\text{CNC}$ , BRA: $\delta\text{O-H}$                                                         |
| 1309 (w)  |           | 1312 | A | I | 2MP: $\delta\text{C-H}$ , $\nu_{(\text{ass})}\text{CNC}$ , BRA: $\delta\text{O-H}$ , $\nu\text{C-Cl}$ , $\nu\text{C-OH}$ , $\nu\text{C=O}$ |
| 1350 (s)  |           | 1316 | A | I | BRA: $\nu_{(\text{ass})}\text{CCC}$ , $\nu\text{C-OH}$ , $\nu\text{C=O}$                                                                   |
|           | 1380 (vw) | 1385 | I | A | BRA: $\nu_{(\text{ass})}\text{CCC}$ , $\nu\text{C-OH}$ , $\nu\text{C=O}$                                                                   |
| 1353 (s)  |           | 1386 | A | I | 2MP: $\rho_{(w)}\text{CH}_3$ , $\delta\text{C-H}$ , BRA: $\nu\text{C-OH}$                                                                  |
| 1407 (vw) |           | 1402 | A | I | 2MP: $\rho_{(w)}\text{CH}_3$ , $\delta\text{C-H}$ , BRA: $\nu\text{C-OH}$                                                                  |
| 1418 (vw) |           | 1403 | A | I | 2MP: $\rho_{(w)}\text{CH}_3$ , $\nu_{(\text{ass})}\text{CNC}$ , $\delta\text{C-H}$ , BRA: $\delta\text{C-OH}$                              |
| 1418 (vw) |           | 1443 | A | I | 2MP: $\rho_{(\text{sc})}\text{CH}_3$ , $\nu_{(\text{ass})}\text{CNC}$ , $\delta\text{C-H}$ , BRA: $\delta\text{C-OH}$                      |

**Table S12.** Calculated and experimental frequencies for the 2MP·BRA (2) complex (continued).

|           |           |      |   |   |                                                                                                         |
|-----------|-----------|------|---|---|---------------------------------------------------------------------------------------------------------|
| 1450 (vw) |           | 1445 | A | A | 2MP: $\rho_{(sc)}\text{CH}_3$ , $\nu_{(ass)}\text{CNC}$ , $\delta\text{C-H}$                            |
| 1476 (vw) |           | 1446 | A | I | 2MP: $\rho_{(sc)}\text{CH}_3$ , $\nu_{(ass)}\text{CNC}$ , $\delta\text{C-H}$ , BRA: $\delta\text{C-OH}$ |
|           | 1530 (vw) | 1532 | I | A | 2MP: $\nu_{(ass)}\text{CNC}$ , $\delta\text{C-H}$ , BRA: $\delta\text{C-OH}$                            |
| 1533 (vw) |           | 1535 | A | I | 2MP: $\nu_{(ass)}\text{CNC}$ , $\delta\text{C-H}$ , BRA: $\nu\text{C-Cl}$                               |
| 1591 (w)  |           | 1574 | A | I | BRA: $\delta\text{O-H}$ , $\nu\text{C-C}$ , $\nu\text{C-OH}$ , $\nu\text{C=O}$                          |
|           | 1603 (m)  | 1602 | I | A | 2MP: $\rho_{(w)}\text{CH}_3$ , $\delta\text{C-H}$ , $\nu\text{C-C}$                                     |
| 1611 (s)  |           | 1602 | A | I | BRA: $\nu\text{C-C}$ , $\nu\text{C-OH}$ , $\nu\text{C=O}$                                               |
|           | 1627 (vs) | 1608 | I | A | BRA: $\nu\text{C=O}$ , $\delta$ ring                                                                    |
| 1627 (s)  |           | 1609 | A | I | BRA: $\nu\text{C=O}$ , $\delta$ ring                                                                    |
| 1662 (vs) |           | 1611 | A | I | BRA: $\delta(\pi)\text{O-H}$ , $\delta$ ring                                                            |
| 1665 (vs) |           | 1612 | A | I | BRA: $\delta(\pi)\text{O-H}$                                                                            |
| 2158 (vw) |           | 1987 | A | I | BRA: $\nu\text{O-H}$                                                                                    |
| 2369 (w)  |           | 1988 | A | I | BRA: $\nu\text{O-H}$                                                                                    |
| 2700 (vw) |           | 2230 | A | I | 2MP: $\nu_{(s)}\text{CH}_3$                                                                             |
| 2920 (vw) |           | 2246 | A | I | 2MP: $\nu_{(s)}\text{CH}_3$                                                                             |
|           | 2929 (vw) | 2961 | A | I | 2MP: $\nu_{(ass)}\text{CH}_3$                                                                           |
| 3099 (vw) |           | 2962 | A | I | 2MP: $\nu_{(ass)}\text{CH}_3$                                                                           |
|           | 3082 (vw) | 3047 | I | A | 2MP: $\nu_{(ass)}\text{CH}_3$                                                                           |
| 3246 (vw) |           | 3168 | A | I | 2MP: $\nu\text{C-H}_{(ring)}$                                                                           |
| 3480 (vw) |           | 3168 | A | I | 2MP: $\nu\text{C-H}_{(ring)}$                                                                           |

$\nu$ -stretching,  $\delta$ -deformation (bending), sc.-scissors,  $\rho_w$ -wagging,  $\rho_r$ -rocking,  $\rho_t$ -twisting,  $\pi$ -out of the plane, s-symmetric, ass-asymmetric, vs-very strong, s-strong, m-medium, w-weak, vw-very weak, A-active, I-inactive band

**Table S13.** Calculated and experimental frequencies for the TrMP·CLA (**3a**) complex.

| IR FREQUENCIES [cm <sup>-1</sup> ] | RAMAN FREQUENCIES [cm <sup>-1</sup> ] | HARM. FREQUENCIES [cm <sup>-1</sup> ] | IR | RAMAN | ASSIGNMENTS                                                                                         |
|------------------------------------|---------------------------------------|---------------------------------------|----|-------|-----------------------------------------------------------------------------------------------------|
| 69 (vw)                            |                                       | 68                                    | I  | A     | TrMP: $\rho_{(r)}\text{CH}_3$ , ring asym. torsion                                                  |
| 82 (vw)                            |                                       | 80                                    | A  | I     | TrMP+CLA: ring asym. torsion                                                                        |
| 110 (m)                            |                                       | 111                                   | A  | I     | TrMP+CLA: ring asym. torsion                                                                        |
| 116 (m)                            |                                       | 115                                   | A  | I     | TrMP+CLA: ring asym. torsion                                                                        |
| 199 (w)                            |                                       | 199                                   | A  | I     | CLA: ring butterfly(s), $\nu\text{CCl}$ ; TrMP: $\rho_{(r)}\text{CH}_3$                             |
| 204 (w)                            |                                       | 202                                   | A  | I     | CLA: ring butterfly(s), $\nu\text{CCl}$ ; TrMP: $\delta_{(\pi)}\text{CH}$ , $\rho_{(r)}\text{CH}_3$ |
|                                    | 217 (vw)                              | 213                                   | I  | A     | CLA: $\delta\text{ring}$ , $\delta\text{C-OH}$                                                      |
| 237 (vs)                           |                                       | 232                                   | A  | I     | TrMP: $\rho_{(r)}\text{CH}_3$ , $\delta_{(\pi)}\text{CNC}$ , $\delta_{(\pi)}\text{C-H}$             |
|                                    | 239 (s)                               | 232                                   | I  | A     | TrMP: $\rho_{(r)}\text{CH}_3$ , $\delta_{(\pi)}\text{CNC}$ , $\delta_{(\pi)}\text{C-H}$             |
| 284 (w)                            |                                       | 283                                   | A  | I     | CLA: $\nu\text{CCl}$ , $\delta\text{C-OH}$ , $\delta\text{ring}$                                    |
|                                    | 288 (m)                               | 285                                   | I  | A     | CLA: $\nu\text{CCl}$ , $\delta\text{C-OH}$ , $\delta\text{ring}$                                    |
|                                    | 336 (vw)                              | 328                                   | I  | A     | TrMP: $\rho_{(r)}\text{CH}_3$ , $\delta_{(\pi)\text{ring}}$ , $\nu\text{C-CH}_3$                    |
| 345 (s)                            |                                       | 345                                   | A  | I     | CLA: $\nu\text{CCl}$ , $\delta\text{C-OH}$                                                          |
|                                    | 353 (vw)                              | 351                                   | I  | A     | CLA: $\delta(\text{CO} + \text{OH})$ , $\nu\text{CCl}$ ,                                            |
| 362 (m)                            |                                       | 356                                   | A  | I     | CLA: $\delta(\text{CO} + \text{OH})$ , $\nu\text{CCl}$ ,                                            |
|                                    | 367 (w)                               | 361                                   | I  | A     | CLA: $\delta(\text{CO} + \text{OH})$                                                                |
|                                    | 389 (m)                               | 384                                   | I  | A     | CLA: $\delta\text{ring}$                                                                            |
| 409                                |                                       | 406                                   | A  | I     | CLA: $\delta(\text{CO} + \text{OH})$ , $\nu\text{CCl}$ ,                                            |
|                                    | 408 (w)                               | 407                                   | I  | A     | CLA: $\delta\text{CO}$                                                                              |
|                                    | 458 (vw)                              | 454                                   | I  | A     | TrMP: $\rho_{(w,\pi)}\text{CNC}$ , $\delta_{(\pi)}\text{NH}$                                        |
| 459 (vw)                           |                                       | 454                                   | A  | I     | TrMP: $\rho_{(w,\pi)}\text{CNC}$ , $\delta_{(\pi)}\text{NH}$ , $\rho_{(w,\pi)}\text{CH}_3$          |
|                                    |                                       | 471                                   | I  | A     | TrMP: $\rho_{(r)}\text{ring}$ , $\delta\text{C-CH}_3$                                               |
| 472 (vw)                           |                                       | 473                                   | A  | I     | TrMP: $\rho_{(w,\pi)}\text{CH}_3$ , $\delta_{(\pi)}\text{CH}$ , $\delta\text{ring}$                 |
| 484 (vw)                           |                                       | 482                                   | A  | I     | TrMP: $\rho_{(r)}\text{ring}$ , $\nu\text{C-CH}_3$                                                  |
|                                    | 489 (w)                               | 483                                   | I  | A     | TrMP: $\rho_{(r)}\text{ring}$ , $\nu\text{C-CH}_3$                                                  |
|                                    | 511 (vw)                              | 499                                   | I  | A     | CLA: $\delta\text{ring}$                                                                            |
| 537 (vw)                           |                                       | 532                                   | A  | I     | CLA: $\delta\text{C-OH}$ , $\nu\text{CCl}$ , $\delta_{(\text{sc.})}\text{CCC}(\text{ring})$         |
|                                    | 547 (vs)                              | 536                                   | I  | A     | CLA: $\delta\text{C-OH}$ , $\nu\text{CCl}$ , $\delta_{(\text{sc.})}\text{CCC}(\text{ring})$         |
|                                    | 568 (w)                               | 564                                   | I  | A     | TrMP: $\nu\text{C-CH}_3$ , $\delta\text{CNC}$                                                       |

**Table S13.** Calculated and experimental frequencies for the TrMP·CLA (**3a**) complex (continued).

|           |           |      |   |   |                                                                                                                  |
|-----------|-----------|------|---|---|------------------------------------------------------------------------------------------------------------------|
| 580 (s)   |           | 571  | A | I | TrMP: $\nu\text{C-CH}_3$ , $\delta\text{CNC}$ ; CLA: $\delta$ ring                                               |
| 694 (m)   |           | 708  | A | I | TrMP: $\nu\text{NH}$ , $\nu\text{C-CH}_3$ , $\nu\text{CCC}(\text{ring})$                                         |
|           | 695 (w)   | 708  | I | A | TrMP: $\nu\text{NH}$ , $\nu\text{C-CH}_3$                                                                        |
| 748 (vw)  |           | 749  | A | I | TrMP: $\nu\text{NH}$ , $\nu\text{C-CH}_3$                                                                        |
|           | 747 (vw)  | 751  | I | A | TrMP: $\nu\text{NH}$ , $\delta\text{C-H}(\text{ring})$ , $\nu\text{C-CH}_3$                                      |
| 777 (vw)  |           | 759  | A | I | CLA: $\rho_{(\text{t}, \pi)}\text{CCC}(\text{ring})$                                                             |
|           | 796 (vw)  | 797  | I | A | CLA: $\delta$ ring, $\nu\text{CCL}$ , $\delta\text{C-OH}$                                                        |
| 800 (w)   |           | 802  | A | I | CLA: $\nu(\text{C=O} + \text{C-O}^-)$ , $\nu\text{CCL}$ ,                                                        |
| 843 (m)   |           | 841  | A | I | CLA: $\nu\text{CCring}$ , $\nu\text{CCL}$ ,                                                                      |
|           | 838 (vw)  | 844  | I | A | TrMP: $\delta_{(\pi)}\text{C-H}(\text{ring})$ , $\delta_{(\text{w})}\text{CH}_3$                                 |
| 879 (w)   |           | 846  | A | I | TrMP: $\delta_{(\pi)}\text{C-H}$                                                                                 |
|           | 877 (vw)  | 847  | I | A | CLA: $\delta_{(\pi)}\text{CH}(\text{ring})$ , $\nu\text{CCL}$ , $\delta$ ring                                    |
|           | 894 (vw)  | 852  | I | A | CLA: $\delta_{(\pi)}\text{OH}$ , $\nu\text{C-OH}$                                                                |
| 885 (w)   |           | 892  | A | I | CLA: $\delta_{(\pi)}\text{OH}$                                                                                   |
|           | 949 (vw)  | 948  | I | A | TrMP: $\rho_{(\text{w})}\text{CH}_3$ , $\delta\text{NH}$ , $\delta$ ring                                         |
| 947 (w)   |           | 948  | A | I | TrMP: $\rho_{(\text{t})}\text{CH}_3$ , $\delta\text{NH}$ , $\nu\text{CH}$ , $\nu\text{C-CH}_3$                   |
| 982 (m)   |           | 974  | A | I | TrMP: $\delta\text{C-H}$ , $\rho_{(\text{t})}\text{CH}_3$ , $\nu\text{CNC}$ , $\nu\text{NH}$                     |
|           |           | 991  | A | I | TrMP: $\delta_{(\pi)}\text{C-H}$ , $\rho_{(\text{w}, \text{ass})}\text{CH}_3$ , $\delta_{(\pi)}\text{CNC}$       |
|           | 988 (vw)  | 993  | I | A | TrMP: $\delta_{(\pi)}\text{C-H}$ , $\rho_{(\text{w}, \text{ass})}\text{CH}_3$ , $\delta_{(\pi)}\text{NH}$        |
| 1000 (w)  |           | 1001 | A | I | TrMP: $\delta\text{C-H}$ , $\rho_{(\text{t})}\text{CH}_3$ , $\nu\text{CNC}$ , $\nu\text{NH}$                     |
| 1033 (w)  |           | 1034 | A | I | TrMP: $\delta_{(\pi)}\text{C-H}$ , $\rho_{(\text{t})}\text{CH}_3$ , $\delta_{(\pi)}\text{C-CH}_3$                |
| 1136 (m)  |           | 1140 | A | I | TrMP: $\delta_{(\pi)}\text{NH}$ ,                                                                                |
|           |           | 1143 | I | A | CLA: $\nu\text{OH}$ , $\delta\text{OH}$ ; TrMP: $\delta\text{CH}$ , $\delta_{(\pi)}\text{NH}$ , $\nu\text{NH}$   |
|           |           | 1146 | I | A | CLA: $\nu\text{OH}$ , $\delta\text{OH}$ ; TrMP: $\delta\text{CH}$ , $\delta_{(\pi)}\text{NH}$ , $\nu\text{NH}$   |
| 1167 (s)  |           | 1150 | A | I | TrMP: $\delta\text{C-H}$ , $\delta\text{C-CH}_3$ , $\delta\text{NH}$                                             |
|           | 1187 (vw) | 1152 | I | A | TrMP: $\nu\text{C-CH}_3$ , $\delta\text{C-H}(\text{ring})$ , $\delta\text{NH}$ , $\rho_{(\text{w})}\text{CH}_3$  |
| 1190 (vs) |           | 1166 | A | I | CLA: $\delta\text{OH}$                                                                                           |
|           |           | 1219 | I | A | TrMP: $\nu\text{C-CH}_3$ , $\delta\text{C-H}(\text{ring})$ , $\nu\text{CN}$                                      |
| 1232 (vs) |           | 1248 | A | I | CLA: $\delta\text{OH} + \nu\text{CC} + \nu\text{C-OH} + \nu\text{CCL}$                                           |
|           | 1255 (m)  | 1258 | I | A | CLA: $\nu\text{CCL} + \nu\text{CC}$ ; TrMP: $\nu\text{C-CH}_3$ , $\delta\text{C-H}(\text{ring})$                 |
|           | 1277 (s)  | 1264 | I | A | TrMP: $\nu\text{C-CH}_3$ , $\delta\text{C-H}(\text{ring})$ , $\delta\text{CNC}$ , $\rho_{(\text{w})}\text{CH}_3$ |

**Table S13.** Calculated and experimental frequencies for the TrMP-CLA (**3a**) complex (continued).

|           |           |      |   |   |                                                                                                                                             |
|-----------|-----------|------|---|---|---------------------------------------------------------------------------------------------------------------------------------------------|
| 1270 (vs) |           | 1265 | A | I | TrMP: $\nu\text{C-CH}_3$ , $\delta\text{C-H}_{(\text{ring})}$ , $\nu_{(\text{ass.})}\text{CNC}$ , $\rho_{(\text{w})}\text{CH}_3$            |
| 1286 (vs) |           | 1289 | A | I | TrMP: $\delta_{(\pi)}\text{C-CH}_3$ , $\delta\text{C-H}_{(\text{ring})}$ , $\nu_{(\text{ass.})}\text{CNC}$ , $\rho_{(\text{w})}\text{CH}_3$ |
|           |           | 1289 | I | A | TrMP: $\nu\text{C-H}_{(\text{ring})}$ , $\nu\text{CC}_{(\text{ring})}$ , $\nu\text{CN}$                                                     |
|           | 1346 (vs) | 1330 | I | A | TrMP: $\delta\text{C-CH}_3$ , $\delta\text{NH}$ , $\nu\text{CC}$                                                                            |
| 1346 (m)  |           | 1341 | A | I | CLA: $\delta_{\text{ring}}$ , $\delta\text{CCl}$                                                                                            |
| 1377 (s)  |           | 1372 | A | I | TrMP: $\rho_{(\text{w})}\text{CH}_3$ , $\nu\text{C-CH}_3$                                                                                   |
|           | 1371 (m)  | 1376 | I | A | TrMP: $\rho_{(\text{w})}\text{CH}_3$ , $\delta\text{NH}$ , $\delta\text{CH}_{(\text{ring})}$                                                |
| 1386 (m)  |           | 1383 | A | I | TrMP: $\rho_{(\text{t})}\text{CH}_3$                                                                                                        |
|           | 1390 (m)  | 1392 | I | A | TrMP: $\rho_{(\text{w})}\text{CH}_3$ , $\delta\text{NH}$ , $\delta\text{CH}_{(\text{ring})}$                                                |
|           | 1425 (vw) | 1428 | I | A | TrMP: $\rho_{(\text{t})}\text{CH}_3$                                                                                                        |
|           |           | 1447 | I | A | TrMP: $\delta_{(\text{sc.})}\text{CH}_3$ , $\nu\text{C-CH}_3$ , $\nu_{(\text{ass})}\text{CN}$                                               |
| 1448 (m)  |           | 1448 | A | I | TrMP: $\delta_{(\text{sc.})}\text{CH}_3$ , $\nu\text{C-CH}_3$ , $\nu_{(\text{ass})}\text{CN}$                                               |
|           |           | 1451 | I | A | TrMP: $\delta_{(\text{w})}\text{CH}_3$ , $\delta\text{NH}$ , $\nu\text{CNC}$ , $\nu\text{C-CH}_3$                                           |
|           | 1496 (w)  | 1466 | I | A | TrMP: $\rho_{(\text{t})}\text{CH}_3$ , $\delta\text{CH}$ , $\nu\text{CN}$                                                                   |
|           | 1518 (w)  | 1507 | I | A | TrMP: $\delta_{(\text{ass. sc.})}\text{CH}_3$ , $\delta\text{NH}$ , $\nu\text{CN}$ , $\nu\text{CC}$                                         |
| 1502 (vs) |           | 1509 | A | I | TrMP: $\delta_{(\text{t})}\text{CH}_3$ , $\delta\text{NH}$ , $\nu\text{CN}$ , $\nu\text{CC}$                                                |
| 1530 (vs) |           | 1527 | A | I | CLA: $\nu_{(\text{ass})}\text{CC}_{\text{ring}}$ , $\delta\text{OH}$ , $\delta\text{CCl}$                                                   |
|           |           | 1528 | I | A | CLA: $n(\text{ass})\text{CCl}$ , $\delta\text{OH}$ , $\nu\text{C-O-}$ ; TrMP: $n\text{CN}$                                                  |
| 1616 (w)  |           | 1598 | A | I | TrMP: $\delta\text{C-CH}_3$ , $\delta\text{CH}_{(\text{ring})}$ , $\nu\text{CC}_{\text{ring}}$                                              |
|           | 1602 (vs) | 1602 | I | A | TrMP: $\delta\text{NH}$ , $\delta\text{CH}_{(\text{ring})}$ , $\delta\text{CC}_{\text{ring}}$ , CLA: $\delta\text{CC}_{\text{ring}}$ ,      |
|           | 1633 (vs) | 1622 | I | A | TrMP: $\delta\text{NH}$ , $\delta\text{CNC}$                                                                                                |
| 1685 (m)  |           | 1642 | A | I | CLA: $\nu\text{CC}_{\text{ring}}$ , $\delta\text{OH}$ , $\delta(\text{C=O+C-O}^-)$                                                          |
|           | 1642 (m)  | 1642 | I | A | TrMP: $\delta_{(\pi)}\text{NH}$ ; CLA: $\nu\text{C=O}$ , $\delta\text{C-OH}$                                                                |
|           | 2740 (vw) | 2607 | I | A | TrMP: $\nu\text{NH}$                                                                                                                        |
| 2447 (vw) |           | 2616 | A | I | TrMP: $\nu_{(\text{s})}\text{CH}_3$                                                                                                         |
| 2931 (vw) |           | 2968 | A | I | TrMP: $\nu_{(\text{s})}\text{CH}_3$                                                                                                         |
|           | 2927 (w)  | 2968 | I | A | TrMP: $\nu_{(\text{s})}\text{CH}_3$                                                                                                         |
| 2950 (vw) |           | 2972 | A | I | TrMP: $\nu_{(\text{s})}\text{CH}_3$                                                                                                         |
|           | 2964 (vw) | 2973 | I | A | TrMP: $\nu_{(\text{s})}\text{CH}_3$                                                                                                         |
|           | 2994 (vw) | 2976 | I | A | TrMP: $\nu_{(\text{s})}\text{CH}_3$                                                                                                         |
|           |           | 3041 | I | A | TrMP: $\nu_{(\text{s})}\text{CH}_3$                                                                                                         |

**Table S13.** Calculated and experimental frequencies for the TrMP·CLA (**3a**) complex (continued)

|          |           |      |   |   |                                       |
|----------|-----------|------|---|---|---------------------------------------|
| 3166 (w) |           | 3093 | A | I | CLA: $\nu$ OH                         |
| 3155 (w) |           | 3094 | A | I | TrMP: $\nu_{(\text{ass})}\text{CH}_3$ |
|          | 3113 (vw) | 3113 | I | A | CLA: $\nu$ OH                         |
| 3160 (w) |           | 3194 | A | I | TrMP: $\nu\text{CH}_{(\text{ring})}$  |
|          | 3166 (vw) | 3194 | I | A | TrMP: $\nu\text{CH}_{(\text{ring})}$  |

$\nu$ -stretching,  $\delta$ -deformation (bending), sc.-scissors,  $\rho_w$ -wagging,  $\rho_r$ -rocking,  $\rho_t$ -twisting,  $\pi$ -out of the plane, s-symmetric, ass-asymmetric, vs-very strong, s-strong, m-medium, w-weak, vw-very weak, A-active, I-inactive band



**Table S14.** Calculated and experimental frequencies for the TrMP·BRA (4) complex.

| IR FREQUENCIES<br>[cm <sup>-1</sup> ] | RAMAN<br>FREQUENCIES<br>[cm <sup>-1</sup> ] | HARM.<br>FREQUENCIES<br>[cm <sup>-1</sup> ] | IR | RAMAN | ASSIGNMENTS                                                                     |
|---------------------------------------|---------------------------------------------|---------------------------------------------|----|-------|---------------------------------------------------------------------------------|
| 82 (vw)                               |                                             | 79                                          | A  | I     |                                                                                 |
| 95 (vw)                               |                                             | 97                                          | A  | I     |                                                                                 |
| 112 (vw)                              |                                             | 105                                         | A  | I     | BRA: ring asym. torsion                                                         |
|                                       |                                             | 108                                         | I  | A     | BRA: ring asym. torsion                                                         |
| 160 (vw)                              |                                             | 156                                         | A  | I     | TrMP: $\rho_{(w)}\text{CH}_3$                                                   |
|                                       | 160 (vw)                                    | 171                                         | I  | A     | TrMP: $\rho_{(r)}\text{CH}_3$ , $\nu\text{CH}_{(\text{methyl})}$                |
|                                       | 178 (vw)                                    | 176                                         | I  | A     | TrMP: $\rho_{(r)}\text{CH}_3$ , $\nu\text{CH}_{(\text{methyl})}$                |
| 193 (w)                               |                                             | 185                                         | A  | I     | TrMP: $\rho_{(r)}\text{CH}_3$                                                   |
|                                       | 195 (w)                                     | 189                                         | I  | A     | TrMP: $\rho_{(r)}\text{CH}_3$ , $\nu\text{CH}_{(\text{methyl})}$                |
| 198 (vw)                              |                                             | 198                                         | A  | I     | TrMP: $\rho_{(r)}\text{CH}_3$ , BRA: $\delta_{\text{ring}}$ , $\nu\text{C-Br}$  |
|                                       | 201 (w)                                     | 205                                         | I  | A     | BRA: $\delta_{\text{ring}}$ , $\nu\text{C-Br}$                                  |
|                                       | 209 (m)                                     | 207                                         | I  | A     | TrMP: $\rho_{(r)}\text{CH}_3$ , BRA: ring butterfly                             |
| 211 (w)                               |                                             | 211                                         | A  | I     | TrMP: $\rho_{(r)}\text{CH}_3$ , BRA: ring butterfly                             |
|                                       |                                             | 221                                         | A  | I     | BRA: $\delta\text{C-Br}$                                                        |
|                                       |                                             | 224                                         | I  | A     | BRA: $\delta\text{C-Br}$                                                        |
|                                       | 271 (vw)                                    | 287                                         | I  | A     | BRA: $\delta_{(\text{t}, \pi)}\text{ring}$                                      |
|                                       | 297 (vw)                                    | 300                                         | I  | A     | TrMP: $\delta\text{C-CH}_3$                                                     |
| 293 (vw)                              |                                             | 302                                         | A  | I     | BRA: $\nu\text{C-Br}$ , $\delta_{(\text{s}, \text{r})}(\text{C-O}+\text{C=O})$  |
| 350 (m)                               |                                             | 340                                         | A  | I     | TrMP: $\delta_{(\pi)}\text{C-CH}_3$ , $\delta_{(\pi)}\text{CH}_{(\text{ring})}$ |
|                                       | 337 (vw)                                    | 340                                         | I  | A     | TrMP: $\delta_{(\pi)}\text{C-CH}_3$ , $\delta_{(\pi)}\text{CH}_{(\text{ring})}$ |
| 350 (m)                               |                                             | 357                                         | A  | I     | BRA: $\delta(\text{CO} + \text{OH})$                                            |
|                                       | 362 (w)                                     | 369                                         | I  | A     | BRA: $\delta(\text{CO} + \text{OH})$                                            |
|                                       | 388 (m)                                     | 390                                         | I  | A     | BRA: $\delta_{\text{ring}}$                                                     |
| 405 (m)                               |                                             | 406                                         | A  | I     | BRA: $\delta\text{CO}$                                                          |
|                                       | 406 (w)                                     | 407                                         | I  | A     | BRA: $\delta\text{CO}$                                                          |
|                                       | 458 (vw)                                    | 447                                         | I  | A     | TrMP: $\rho_{(w, \pi)}\text{CNC}$ , $\delta_{(\pi)}\text{NH}$                   |
| 455 (vw)                              |                                             | 448                                         | A  | I     | TrMP: $\rho_{(w, \pi)}\text{CNC}$ , $\delta_{(\pi)}\text{NH}$                   |
| 471 (vw)                              |                                             | 474                                         | A  | I     | TrMP: $\rho_{(r)}\text{ring}$                                                   |

**Table S14.** Calculated and experimental frequencies for the TrMP·BRA (**4**) complex (continued).

|           |          |      |   |   |                                                                                                                                     |
|-----------|----------|------|---|---|-------------------------------------------------------------------------------------------------------------------------------------|
| 491 (vw)  |          | 491  | A | I | TrMP: $\nu_{(s)}\text{C-CH}_3$                                                                                                      |
|           | 493 (w)  | 491  | I | A | TrMP: $\nu_{(s)}\text{C-CH}_3$                                                                                                      |
|           | 510 (vw) | 511  | I | A | BRA: $\delta$ ring, $\nu\text{C-Br}$                                                                                                |
| 519 (vw)  |          | 519  | A | I | BRA: $\delta$ ring, $\nu\text{C-Br}$                                                                                                |
|           | 540 (vw) | 549  | I | A | TrMP: $\rho_{(\pi)}\text{ring}$ , $\delta_{(\pi)}\text{CH}_{(\text{ring})}$                                                         |
| 561 (w)   |          | 553  | A | I | BRA: ring butterfly <sub>(s)</sub>                                                                                                  |
|           | 557 (s)  | 556  | I | A | TrMP+BRA: ring butterfly                                                                                                            |
|           | 570 (w)  | 570  | I | A | TrMP: $\nu\text{C-CH}_3$ , $\delta\text{CNC}$                                                                                       |
| 570 (w)   |          | 570  | A | I | TrMP: $\nu\text{C-CH}_3$ , $\delta\text{CNC}$                                                                                       |
|           | 698 (w)  | 713  | I | A | TrMP: $\delta$ ring, $\nu\text{NH}$ , $\nu\text{C-CH}_3$                                                                            |
| 693 (m)   |          | 713  | A | I | TrMP: $\delta$ ring, $\nu\text{NH}$ , $\nu\text{C-CH}_3$                                                                            |
|           | 746 (vw) | 732  | I | A | BRA: $\rho_{(t,\pi)}\text{CC}_{(\text{ring})}$ , $\delta_{(\pi)}\text{OH}$                                                          |
| 744 (vw)  |          | 735  | A | I | BRA: $\rho_{(t,\pi)}\text{CC}_{(\text{ring})}$ , $\delta_{(\pi)}\text{OH}$                                                          |
| 763 (vw)  |          | 761  | A | I | BRA: $\rho_{(t,\pi)}\text{CC}_{(\text{ring})}$                                                                                      |
|           | 793 (vw) | 781  | I | A | BRA: $\delta$ ring, $\nu\text{C-Br}$                                                                                                |
| 804 (m)   |          | 813  | A | I | BRA: $\delta$ ring                                                                                                                  |
|           | 801 (vw) | 813  | I | A | BRA: $\delta_{(\pi)}\text{OH}$                                                                                                      |
|           | 832 (vw) | 816  | I | A | BRA: $\delta_{(\pi)}\text{OH}$ , $\nu\text{C-Br}$ , $\nu\text{C-C}$                                                                 |
| 877 (vw)  |          | 862  | A | I | TrMP: $\delta_{(\pi)}\text{C-H}$ , $\delta_{(\pi)}\text{N-H}$ , $\delta_{(\pi)}\text{C-CH}_3$                                       |
|           | 882 (vw) | 863  | I | A | TrMP: $\delta_{(\pi)}\text{C-H}_{(\text{ring})}$                                                                                    |
|           | 956 (vw) | 971  | I | A | TrMP: $\delta\text{C-CH}_3$ , $\rho_{(w,\text{ass})}\text{CH}_3$ , $\delta\text{CNC}$                                               |
| 968 (m)   |          | 975  | A | I | TrMP: $\delta\text{C-CH}_3$ , $\rho_{(w,\text{ass})}\text{CH}_3$ , $\delta\text{CNC}$                                               |
|           | 968 (vw) | 996  | I | A | TrMP: $\rho_{(w,\text{ass})}\text{CH}_3$ , $\delta_{(\pi)}\text{NH}$                                                                |
| 1008 (vw) |          | 1004 | A | I | TrMP: $\delta\text{C-CH}_3$ , $\rho_{(w,\text{ass})}\text{CH}_3$ , $\delta_{(\pi)}\text{CH}_{(\text{ring})}$ , $\nu\text{CC}$       |
| 1035 (vw) |          | 1033 | A | I | TrMP: $\nu\text{C-CH}_3$ , $\rho_{(w,\text{ass})}\text{CH}_3$ , $\delta_{(\pi)}\text{CH}_{(\text{ring})}$ , $\delta_{(t)}\text{CC}$ |
| 1124 (w)  |          | 1140 | A | I | TrMP: $\delta\text{CH}$ , $\delta_{(\pi)}\text{NH}$ , $\delta_{(\pi)}\text{CNC}$                                                    |
|           | 1171(vw) | 1155 | I | A | TrMP: $\delta\text{CH}$ , $\delta_{(\pi)}\text{NH}$ , $\nu\text{NH}$                                                                |
| 1178 (s)  |          | 1164 | A | I | BRA: $\delta\text{OH}$ , $\nu\text{CC}$                                                                                             |
| 1193 (m)  |          | 1226 | A | I | TrMP: $\nu\text{C-CH}_3$ , $\delta\text{C-H}_{(\text{ring})}$ , $\nu\text{CN}$                                                      |
|           | 1258(s)  | 1257 | I | A | BRA: $\nu\text{CC}$ , $\nu\text{CO}$                                                                                                |
| 1264 (vs) |          | 1261 | A | I | BRA: $\delta\text{OH} + \nu\text{CC}$                                                                                               |

**Table S14.** Calculated and experimental frequencies for the TrMP·BRA (4) complex (continued).

|           |           |      |   |   |                                                                                                     |
|-----------|-----------|------|---|---|-----------------------------------------------------------------------------------------------------|
| 1270 (vs) |           | 1272 | A | I | TrMP: $\nu\text{C-H}_{(\text{ring})}$ , $\nu\text{CC}_{(\text{ring})}$                              |
| 1323 (m)  |           | 1301 | A | I | BRA: $\nu\text{CC}$ , $\nu\text{CO}$                                                                |
| 1323 (m)  |           | 1330 | A | I | TrMP: $\delta\text{C-CH}_3$ , $\delta\text{NH}$ , $\nu\text{CC}$                                    |
|           | 1337 (m)  | 1332 | I | A | TrMP: $\delta\text{C-CH}_3$ , $\delta\text{NH}$ , $\nu\text{CC}$                                    |
| 1342 (s)  |           | 1346 | A | I | BRA: $\nu\text{CC}$ , $\nu\text{C=O}$                                                               |
| 1369 (m)  |           | 1362 | A | I | TrMP: $\delta_{(\text{w})}\text{CH}_3$ , $\delta\text{NH}$ , $\delta\text{CH}_{(\text{ring})}$      |
|           | 1370 (m)  | 1371 | I | A | TrMP: $\delta_{(\text{w})}\text{CH}_3$ , $\delta\text{NH}$ , $\delta\text{CH}_{(\text{ring})}$      |
| 1371 (m)  |           | 1374 | A | I | TrMP: $\delta_{(\text{ass. w})}\text{CH}_3$ , $\delta\text{NH}$ , $\nu\text{C-CH}_3$                |
| 1382 (w)  |           | 1383 | A | I | TrMP: $\delta_{(\text{ass. w})}\text{CH}_3$ , $\delta\text{NH}$ , $\nu\text{C-CH}_3$                |
| 1397 (vw) |           | 1395 | A | I | TrMP: $\delta_{(\text{w})}\text{CH}_3$ , $\nu\text{C-CH}_3$ , $\delta\text{NH}$ , $\nu\text{CN}$    |
|           | 1393 (w)  | 1395 | I | A | TrMP: $\delta_{(\text{w})}\text{CH}_3$ , $\nu\text{C-CH}_3$ , $\delta\text{NH}$ , $\nu\text{CN}$    |
| 1425 (w)  |           | 1428 | I | A | TrMP: $\delta_{(\text{sc.})}\text{CH}_3$ , $\nu\text{C-CH}_3$ , $\nu\text{CN}$                      |
| 1439 (vw) |           | 1435 | A | I | TrMP: $\delta_{(\text{ass. sc.})}\text{CH}_3$ , $\nu\text{C-CH}_3$ , $\nu\text{CN}$                 |
|           | 1433 (vw) | 1437 | I | A | TrMP: $\delta_{(\text{ass. sc.})}\text{CH}_3$ , $\nu\text{C-CH}_3$ , $\nu\text{CN}$                 |
| 1442 (w)  |           | 1442 | A | I | TrMP: $\delta_{(\text{ass. sc.})}\text{CH}_3$ , $\nu\text{CN}$                                      |
| 1470 (vw) |           | 1456 | A | I | TrMP: $\delta_{(\text{ass. sc.})}\text{CH}_3$ , $\delta\text{NH}$                                   |
| 1489 (vw) |           | 1463 | A | I | TrMP: $\delta_{(\text{ass. sc.})}\text{CH}_3 + \delta\text{CH}_{(\text{ring})}$ , $\nu\text{CN}$    |
|           | 1516 (vw) | 1513 | I | A | TrMP: $\delta_{(\text{ass. sc.})}\text{CH}_3$ , $\delta\text{NH}$ , $\nu\text{CN}$ , $\nu\text{CC}$ |
| 1517 (vs) |           | 1513 | A | I | TrMP: $\delta_{(\text{ass. sc.})}\text{CH}_3$ , $\nu\text{C-CH}_3$ , $\nu\text{CN}$                 |
| 1520 (s)  |           | 1528 | A | I | BRA: $\nu\text{CC}$ , $\delta\text{OH}$ , $\nu\text{C=O}$                                           |
| 1544 (w)  |           | 1585 | A | I | BRA: $\nu\text{CC}$ , $\nu\text{C=O}$                                                               |
| 1595 (w)  |           | 1594 | A | I | BRA: $\delta\text{OH}$ , $\nu\text{C=O}$ , $\nu\text{CC}_{(\text{ring})}$ , TrMP: $\delta\text{NH}$ |
| 1601 (vw) |           | 1600 | A | I | TrMP: $\nu\text{CC}_{(\text{ring})}$ , $\delta\text{CH}_{(\text{ring})}$ , $\delta\text{NH}$        |
|           | 1621 (s)  | 1622 | I | A | TrMP: $\delta\text{NH}$ , BRA: $\delta\text{C=C}$ , $\delta\text{OH}$                               |
| 1620 (w)  |           | 1626 | A | I | TrMP: $\delta\text{NH}$ , $\nu\text{CN}$ , BRA: $\delta\text{C=C}$ , $\delta\text{OH}$              |
|           | 1680 (m)  | 1639 | I | A | TrMP: $\delta\text{NH}$ , $\nu\text{CN}$ , BRA: $\delta\text{C=C}$ , $\delta\text{OH}$              |
| 1637 (w)  |           | 1640 | A | I | TrMP: $\delta\text{NH}$ , BRA: $\nu\text{CC}$ , $\nu\text{CO}$                                      |
|           | 2740 (vw) | 2579 | I | A | TrMP: $\nu\text{NH}$                                                                                |
| 2495 (vw) |           | 2598 | A | I | TrMP: $\nu\text{NH}$                                                                                |
| 2927 (vw) |           | 2957 | A | I | TrMP: $\nu_{(\text{s})}\text{CH}_3$                                                                 |
|           | 2958 (vw) | 2958 | I | A | TrMP: $\nu_{(\text{s})}\text{CH}_3$                                                                 |

**Table S14.** Calculated and experimental frequencies for the TrMP·BRA (**4**) complex (continued).

|           |           |      |   |   |                                                      |
|-----------|-----------|------|---|---|------------------------------------------------------|
| 2964 (vw) |           | 2983 | A | I | TrMP: $\nu_{(s)}\text{CH}_3$                         |
| 2997 (vw) |           | 2987 | A | I | TrMP: $\nu_{(s)}\text{CH}_3$                         |
|           | 2994 (vw) | 2987 | I | A | TrMP: $\nu_{(s)}\text{CH}_3$                         |
|           | 3000 (vw) | 3029 | I | A | TrMP: $\nu_{(ass)}\text{CH}_3$                       |
| 3083 (vw) |           | 3082 | A | I | TrMP: $\nu_{(ass)}\text{CH}_3$                       |
| 3109 (w)  |           | 3106 | A | I | BRA: $\nu\text{OH}$ , TrMP: $\nu_{(ass)}\text{CH}_3$ |
|           | 3105 (vw) | 3106 | I | A | BRA: $\nu\text{OH}$ , TrMP: $\nu_{(ass)}\text{CH}_3$ |
| 3167 (m)  |           | 3109 | A | I | BRA: $\nu\text{OH}$ , TrMP: $\nu_{(ass)}\text{CH}_3$ |
|           | 3120 (vw) | 3129 | I | A | BRA: $\nu\text{OH}$                                  |
|           | 3183 (vw) | 3207 | I | A | TrMP: $\nu\text{CH}_{(ring)}$                        |
| 3215 (vw) |           | 3208 | A | I | TrMP: $\nu\text{CH}_{(ring)}$                        |

$\nu$ -stretching,  $\delta$ -deformation (bending), sc.-scissors,  $\rho_w$ -wagging,  $\rho_r$ -rocking,  $\rho_t$ -twisting,  $\pi$ -out of the plane, s-symmetric, ass-asymmetric, vs-very strong, s-strong, m-medium, w-weak, vw-very weak, A-active, I-inactive band

**Table S15.** Comparison of the hydrogen bonds geometry with tunnelling frequencies and tunnelling activation energies for known supramolecular complexes of methyl derivatives of pyrazine. PT-the proton transfer, HB- the hydrogen bond without proton transfer, a,b- the number of protonated nitrogen atoms in pyrazine ring.

| Compounds                      | Type of HB                                                           | Type of structure | Numbering of methyl groups                                 | Tunneling frequencies                      | Activation energy    | Literature   |
|--------------------------------|----------------------------------------------------------------------|-------------------|------------------------------------------------------------|--------------------------------------------|----------------------|--------------|
| TMP·CLA<br>(1:1)               | HB <sub>a,b</sub><br>O-H...N<br>O-H...N                              | infinite chain    | C(14)<br>C(15)<br>C(14) <sup>*</sup><br>C(15) <sup>*</sup> | ±2.2 μeV<br>±3.7 μeV<br>±22 μeV<br>±31 μeV | 14.5 meV             | [1-4]        |
| TMP·H <sub>2</sub> SQ<br>(1:1) | HB <sub>a</sub> , PT <sub>b</sub><br>O-H...N<br>O-H...N <sup>+</sup> | dimeric unit      | C(121)<br>C(131)<br>C(151)<br>C(161)                       | ±1.55 μeV<br>±4.20 μeV                     | 15.0 meV<br>13.2 meV | [5,6]        |
| TMP·PIC<br>(1:2)               | PT <sub>a,b</sub><br>O-H...N <sup>+</sup><br>O-H...N <sup>+</sup>    | trimeric unit     | C(22)<br>C(23)<br>C(22) <sup>*</sup><br>C(23) <sup>*</sup> | ±3.16 μeV<br>±4.24 μeV                     | 6.9 meV<br>6.3 meV   | [7]          |
| TMP·BrA                        | HB <sub>a</sub> , PT <sub>b</sub><br>O-H...N<br>O-H...N <sup>+</sup> | dimeric unit      | C(21)<br>C(31)<br>C(51)<br>C(61)                           | only elastic peak                          | -----                | [1]          |
| TrMP·CLA                       | HB <sub>a</sub> , PT <sub>b</sub><br>O-H...N<br>O-H...N <sup>+</sup> | dimeric unit      | C(21)<br>C(31)<br>C(51)                                    | ±4. μeV                                    | 10.4 meV             | present work |
| TrMP·BRA                       | HB <sub>a</sub> , PT <sub>b</sub><br>O-H...N<br>O-H...N <sup>+</sup> | dimeric unit      | C(21)<br>C(31)<br>C(51)                                    | only elastic peak                          | -----                | present work |
| 2MP·CLA                        | HB <sub>a,b</sub><br>O-H...N<br>O-H...N                              | infinite chain    | C(21)                                                      | only elastic peak                          | -----                | present work |
| 2MP·BRA                        | HB <sub>a,b</sub><br>O-H...N<br>O-H...N                              | infinite chain    | C(21)                                                      | ±13.9 μeV                                  | 7.3 meV              | present work |
